# Supplementary material for: Patterns of utilisation of specialist care after SARS-Cov-2 infection: a retrospective cohort study
Source: PubMed Central journal article supplement — BMJ Open. 2023 Mar 7;13(3):e063493. doi: 10.1136/bmjopen-2022-063493 (PMC10008201; doi:10.1136/bmjopen-2022-063493), 2023-03-07
Supplement: bmjopen-2022-063493.draft_revisions.pdf [file bmjopen-2022-063493.draft_revisions.pdf]

# BMJ Open

BMJ Open is committed to open peer review. As part of this commitment we make the peer review history of every article we publish publicly available.

When an article is published we post the peer reviewers' comments and the authors' responses online. We also post the versions of the paper that were used during peer review. These are the versions that the peer review comments apply to.

The versions of the paper that follow are the versions that were submitted during the peer review process. They are not the versions of record or the final published versions. They should not be cited or distributed as the published version of this manuscript.

BMJ Open is an open access journal and the full, final, typeset and author-corrected version of record of the manuscript is available on our site with no access controls, subscription charges or pay-per-view fees (<http://bmjopen.bmj.com>).

If you have any questions on BMJ Open's open peer review process please email [info.bmjopen@bmj.com](mailto:info.bmjopen@bmj.com)

# BMJ Open

## Patterns of Health Services Utilisation after SARS-Cov-2 infection: a retrospective cohort study

|                               |                                                                                                                                                                                                                                                                                                                                                                                                                                       |
|-------------------------------|---------------------------------------------------------------------------------------------------------------------------------------------------------------------------------------------------------------------------------------------------------------------------------------------------------------------------------------------------------------------------------------------------------------------------------------|
| Journal:                      | <i>BMJ Open</i>                                                                                                                                                                                                                                                                                                                                                                                                                       |
| Manuscript ID                 | bmjopen-2022-063493                                                                                                                                                                                                                                                                                                                                                                                                                   |
| Article Type:                 | Original research                                                                                                                                                                                                                                                                                                                                                                                                                     |
| Date Submitted by the Author: | 04-Apr-2022                                                                                                                                                                                                                                                                                                                                                                                                                           |
| Complete List of Authors:     | Formoso, Giulio; Reggio Emilia Local Agency - IRCCS Advanced Technologies and Care Models in Oncology<br>Marino, Massimiliano; Reggio Emilia Local Agency - IRCCS Advanced Technologies and Care Models in Oncology<br>Formisano, Debora; Reggio Emilia Local Agency - IRCCS Advanced Technologies and Care Models in Oncology<br>Grilli, Roberto; Local Health Agency of Romagna, Unità Ricerca Valutativa e Policy Servizi Sanitari |
| Keywords:                     | Organisation of health services < HEALTH SERVICES ADMINISTRATION & MANAGEMENT, Clinical governance < HEALTH SERVICES ADMINISTRATION & MANAGEMENT, COVID-19, EPIDEMIOLOGY, PUBLIC HEALTH                                                                                                                                                                                                                                               |
|                               |                                                                                                                                                                                                                                                                                                                                                                                                                                       |

SCHOLARONE™  
Manuscripts

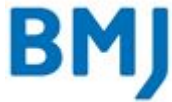

I, the Submitting Author has the right to grant and does grant on behalf of all authors of the Work (as defined in the below author licence), an exclusive licence and/or a non-exclusive licence for contributions from authors who are: i) UK Crown employees; ii) where BMJ has agreed a CC-BY licence shall apply, and/or iii) in accordance with the terms applicable for US Federal Government officers or employees acting as part of their official duties; on a worldwide, perpetual, irrevocable, royalty-free basis to BMJ Publishing Group Ltd ("BMJ") its licensees and where the relevant Journal is co-owned by BMJ to the co-owners of the Journal, to publish the Work in this journal and any other BMJ products and to exploit all rights, as set out in our [licence](#).

The Submitting Author accepts and understands that any supply made under these terms is made by BMJ to the Submitting Author unless you are acting as an employee on behalf of your employer or a postgraduate student of an affiliated institution which is paying any applicable article publishing charge ("APC") for Open Access articles. Where the Submitting Author wishes to make the Work available on an Open Access basis (and intends to pay the relevant APC), the terms of reuse of such Open Access shall be governed by a Creative Commons licence – details of these licences and which [Creative Commons](#) licence will apply to this Work are set out in our licence referred to above.

Other than as permitted in any relevant BMJ Author's Self Archiving Policies, I confirm this Work has not been accepted for publication elsewhere, is not being considered for publication elsewhere and does not duplicate material already published. I confirm all authors consent to publication of this Work and authorise the granting of this licence.

# Patterns of Health Services Utilisation after SARS-Cov-2 infection: a retrospective cohort study

## Authors:

Giulio Formoso <sup>1\*</sup>, MPH MPharm, Massimiliano Marino PhD <sup>1</sup>, Debora Formisano PhD <sup>1</sup>, Roberto Grilli MD <sup>1,2</sup>

## Affiliations:

<sup>1</sup> Direzione Sanitaria, Azienda Unità Sanitaria Locale – IRCCS di Reggio Emilia, Reggio Emilia, Italy

<sup>2</sup> Unità Ricerca Valutativa e Policy Servizi Sanitari, AUSL della Romagna, via De Gasperi, 8, Ravenna, Italy

**Correspondence to:** Giulio Formoso, e-mail: [giulio.formoso@ausl.re.it](mailto:giulio.formoso@ausl.re.it)

Address: Via Amendola 2; 42122 Reggio Emilia (Italy)

**Word count:** 2328 words

1  
2 **Abstract** (word count: 300)  
3  
4  
5  
6  
7

8 **Objective:** to explore the pattern of health services utilisation of people who had a documented SARS-Cov-2 infection, after becoming  
9  
10 negative to the swab test  
11  
12

13 **Design:** retrospective cohort study  
14  
15

16 **Setting:** the Italian province of Reggio Emilia  
17  
18

19 **Participants:** 36,036 subjects who, after being diagnosed covid-19, did not die and were found negative during the period Sept 2020–  
20  
21 March 2021. These were matched for age, sex and Charlson Index with an equal number of subjects never found positive at the SARS-  
22  
23 Cov-2 swab test over the study period  
24  
25  
26

27 **Main outcome measures:** hospital admissions for all medical conditions and for respiratory or cardiovascular conditions only; access to  
28  
29 emergency room (for any cause); outpatient specialist visits (pneumology, cardiology, neurology, endocrinology, nephrology,  
30  
31 dermatology, rehabilitation, mental health); overall cost of care  
32  
33

34 **Results:** within a median follow-up time of 152 days (range 1-180) previous exposure to SARS-Cov-2 infection was always associated with  
35  
36 higher probability of needing access to hospital or ambulatory care, except for dermatology, mental health, and gastroenterology  
37  
38 specialist visits. Post-COVID subjects with Charlson Index  $\geq 1$  were hospitalized more frequently for heart disease and for non-surgical  
39  
40  
41  
42

1  
2 reasons than subjects with Charlson index =0, whereas the opposite occurred for hospitalisations for respiratory diseases and pneumology  
3  
4 visits. A previous SARS-CoV2 infection was associated with 27% higher cost of care compared to people never infected. The difference in  
5  
6 cost was more evident among those with Charlson Index $\geq$ 1. Subjects who had anti-SARS-CoV2 vaccination had lower probability of falling  
7  
8 in the highest cost quartile.  
9  
10

11  
12 **Conclusions:** our findings reflect the burden of post-COVID sequelae, providing some specific insight on their impact on the extra-use of  
13  
14 health services according to patients' characteristics and vaccination status. Vaccination is associated with lower cost of care following  
15  
16 covid infection, highlighting the favourable impact of vaccines on the use of health services even when they do not prevent infection.  
17  
18  
19  
20  
21  
22  
23  
24  
25  
26  
27  
28  
29  
30  
31  
32  
33  
34  
35  
36  
37  
38  
39  
40  
41  
42  
43  
44  
45  
46  
47

## Strengths and limitations of this study

- Our study provide insight on the extra-use of health services and cost of care by COVID patients after they have recovered, compared to people never infected by SARS-Cov-2, also considering their characteristics and vaccination status.
- To date, this is the largest study providing details on ambulatory outpatient visits and hospital admissions associated with long-covid in specific clinical areas.
- Limits in the quality of administrative data cannot be excluded, as well as the possibility of residual confounding.
- Further studies should provide longer follow-up data, also with higher numbers of vaccinated people to allow a comparison between those who developed COVID and those who do not, and to warrant the inclusion of boosted people who could not be included in our cohort yet.

## Introduction

The SARS-Cov-2 pandemic forced radical changes in the organization and delivery of care, requiring a rapid expansion of health services capacity in some sectors (i.e. additional hospital beds in general and intensive care units in particular), the adoption and implementation of public health measures and interventions for efficient identification of new case and contact tracing, and the reorganization of primary care services to allow covid-19 patients to be cared for as much as possible at home. As it has been described, these changes had been at the expense of the management of other diseases, being the volume of procedures and interventions for conditions other than covid-19 drastically reduced [1].

However, the pandemic could have also long-term implications for health care systems, generating additional health care needs in individuals who have been diagnosed covid-19. Indeed, after SARS-Cov-2 infection a variable proportion of individuals experience a condition defined as “post covid-19 syndrome”, or “long covid-19”, with the persistence of signs and symptoms (or occurrence of new symptoms) after one to three months from the end of the acute phase [2,3]. In particular, cohort studies and systematic reviews have described the persistence of several symptoms including neurologic disorders (e.g. the so called “brain fog”, ageusia/anosmia), mental health disorders (e.g. anxiety, depression, sleep problems), functional impairment, respiratory, cardiac, digestive and skin disorders, etc. Although their incidence is widely variable across studies and depends on the background health status and on the initial COVID symptomatology, some of these symptoms (in particular respiratory and neurologic disorders) can affect up to half to three-quarters of recovered patients [4-8].



1  
2 In this study, conducted in the Italian province of Reggio Emilia (population 539,652), we assessed the additional burden (if any) to health  
3  
4 services due to the management of those who had a documented SARS-Cov-2 infection, exploring their pattern of health services  
5  
6 utilisation after becoming negative to the swab test.  
7  
8  
9

## 10 11 12 **Methods**

### 13 14 15 *Study design*

16  
17  
18 We conducted a retrospective cohort study in which individuals from the resident population who had a negative PCR on naso- and  
19  
20 oropharyngeal swab test for SARS-Cov-2, after having been found positive at the same test, were followed up over time and their rates  
21  
22 of health services utilization assessed and compared with a matched cohort of residents never found positive at the SARS-Cov-2 test .  
23  
24  
25

### 26 27 *Study population and data sources*

28  
29 Since the inception of the pandemic in March 2020, a surveillance database has been implemented in the province, including all the  
30  
31 citizens undergoing SARS-Cov-2 swab test and its result.[9, 10] For this study, we identified from the SARS-Cov-2 surveillance database all  
32  
33 those who, after being diagnosed covid-19, did not die and were found negative during the period Sept 2020 – March 2021. These  
34  
35 individuals (n= 36,036) represented the cohort of those who previously had a documented SARS-Cov-2 infection.  
36  
37  
38  
39  
40  
41  
42  
43  
44  
45  
46  
47

1  
2 Through record linkage procedures between the SARS-CoV-2 database and the administrative databases available to the Local Health  
3 Authority, we then assessed their rates of use of health services from the date of the negative swab test (index date) up to June 30, 2021.  
4

5  
6 The administrative databases include, for each resident in the province, demographic information, hospital discharge data (coded  
7 according to the International Classification of Diseases-9-CM [ICD-9-CM]) of diagnosis and procedures, admission and discharge dates,  
8 vital status at discharge, and outpatient pharmacy data at the individual prescription level, as well as access to outpatient ambulatory  
9 care. Data were anonymized, and record linkage procedures were performed according to the unique identification number which is  
10 assigned to each resident. In addition, for each individual, we searched for information on previous hospitalisations (up to preceding 10  
11 years), as registered in these local administrative databases, in order to assess the presence of specific comorbidities individually (chronic  
12 obstructive pulmonary disease, arrhythmia, diabetes, acute myocardial infraction, heart failure, vascular diseases, obesity), and to  
13 estimate individual patients' overall degree of comorbidity (if any), according to the (not age-adjusted) Charlson index.[11]  
14  
15  
16  
17  
18  
19  
20  
21  
22  
23  
24  
25

26  
27 Relying on the same data sources, we identified individuals to be included in the control group among residents alive at Jan 1<sup>st</sup> 2020 and  
28 never found positive at the SARS-Cov-2 swab test over the study period. Individuals in the control group were matched according to age,  
29 sex, and Charlson Index (in four classes: 0, 1, 2 and  $\geq 3$ ). Each control had the same index date of the matched SARS-Cov-2 infected  
30 individual. Therefore the matching procedure made available 36,036 persons for each cohort, with equal distribution as for sex (18,481  
31 were female, 51,3%), age (mean 43, range 1-103), comorbidities (32,561 had Charlson Index 0, while 1391, 1146 and 938 had Charlson  
32 Index 1, 2 and  $\geq 3$ , respectively).  
33  
34  
35  
36  
37  
38  
39  
40  
41  
42  
43  
44  
45  
46  
47

## *Outcome measures*

The following items of care provided over the study period were considered, taking into account the most common symptoms persisting after the acute phase of covid-19 disease.[3]

- Hospital admissions for all medical conditions;
- Hospital admissions for respiratory or cardiovascular conditions only;
- Access to Emergency Room (for any cause);
- Outpatient specialist visits (pneumology, cardiology, neurology, endocrinology, nephrology, dermatology, rehabilitation, mental health).

The cost of individual procedures and services (according to official fees) and of drugs was taken as overall measure of the burden to the regional health care system of the care provided to individuals in both the cohorts. In cost analysis, in addition to the above reported items of care, we considered also all the outpatient diagnostic procedures and tests (i.e. blood tests, chest x-ray, etc.) and drug prescriptions.

## *Statistical analyses*

Descriptive analysis of the items of care provided to individuals in the two cohorts are reported, as well as Poisson rates with 95% confidence intervals (95%CI). Rates have the total number of episodes of care observed as numerator, and person-months as denominator.

1  
2 The strength of the association between previous SARS-Cov-2 infection and rates of use of the items of care considered was assessed  
3  
4 through Hazard Ratios (HR). In order to better disentangle the effect of the previous SARS-Cov-2 infection, rather than of coexisting  
5  
6 diseases, we stratified the analysis by Charlson comorbidity index, thus estimating HRs separately for convalescent covid-19 patients and  
7  
8 control individuals with Charlson Index =0 and with Charlson Index  $\geq 1$ .  
9  
10

11  
12 Mean case vs control cost differences (with 95%CI) are reported overall and according to age, sex, and Charlson Index. Total cost of care  
13  
14 was divided in quartiles and the association between the characteristics of those who had SARS-Cov-2 infection and higher costs was  
15  
16 assessed through a logistic regression model, with the highest costs quartile as dependent variable, and age (in categorised in four classes:  
17  
18  $\leq 30$ , 31-50, 51-70,  $\geq 71$ ), sex, presence of symptoms at diagnosis and hospital admission for covid-19 (both proxy indicators of covid-19  
19  
20 severity), and pre-existence of specific comorbidities as covariates. As 986 (3%) of those who had SARS-CoV-2 infection had also received  
21  
22 SARS-Cov-2 vaccination before testing positive at the swab test, we included SARS-Cov-2 vaccination status among the covariates.  
23  
24  
25  
26  
27  
28  
29

30 ***Patient and public involvement:*** none  
31

32  
33 ***Ethics approval :*** The study has been approved by the Area Vasta Emilia Nord Ethical Committee on 13/01/2022 n° 2022/0004443.  
34  
35  
36  
37  
38  
39  
40  
41  
42  
43  
44  
45  
46  
47

**Results**

After a median follow-up of 152 days (range 1-180), 51 and 186 individuals died, in the control and the SARS-Cov-2 positive group, respectively. Among those who had been positive at the swab test, 16,286 (45%) individuals did not use hospital care and never accessed outpatient services, vs 18,055 (50%) in the control group ( $\chi^2_{1df} = 174,65; p < 0,001$ ).

Both the proportion of individuals having at least one access at the items of care considered and the overall frequency of use was always higher in the SARS-Cov-2 positive cohort, especially for respiratory and cardiovascular hospital admissions and outpatients visits. Dermatology, mental health, and gastroenterology specialist visits has a different pattern, being the difference between the two groups negligible, if any. (table 1)

*Table 1: frequency of use of hospital and ambulatory care by a cohort of 36036 convalescent covid-19 patients vs a matched control cohort, in the Province of Reggio Emilia (Italy).*

|                              |                     | Convalescent Covid- | Matched Control | %Difference |
|------------------------------|---------------------|---------------------|-----------------|-------------|
| In H for respiratory disease | Total N admissions  | 126                 | 45              | +180%       |
| In H for heart disease       | Total N admissions  | 143                 | 76              | +88%        |
| In H for any medical reason  | At least one, N (%) | 724 (2.0)           | 538 (1.5)       |             |
|                              | Total N admissions  | 916                 | 675             | +36%        |
| Access to Emergency Room     | At least one, N (%) | 3383 (9.4)          | 2491 (6.9)      |             |
|                              | Total N accesses    | 4299                | 3186            | +35%        |
| Outpatient specialist visits |                     |                     |                 |             |

|                  |                     |              |            |             |            |            |      |      |
|------------------|---------------------|--------------|------------|-------------|------------|------------|------|------|
| Pneumology       | At least one, N (%) |              | 766 (2.0)  |             | 310 (0.9)  |            |      |      |
|                  | Total N             | First visits | 924        | 572 (61.9)  | 380        | 154 (40.5) | +143 | +271 |
| Cardiology       | At least one, N (%) |              | 1588 (4.4) |             | 1119 (3.0) |            |      |      |
|                  | Total N             | First visits | 1708       | 1173 (68.7) | 1198       | 716 (59.7) | +43  | +64  |
| Neurology        | At least one, N (%) |              | 758 (2.1)  |             | 625 (1.7)  |            |      |      |
|                  | Total N             | First visits | 939        | 568 (60.5)  | 756        | 424 (56.1) | +24  | +34  |
| Rheumatology     | At least one, N (%) |              | 533 (1.5)  |             | 461 (1.3)  |            |      |      |
|                  | Total N             | First visits | 670        | 254 (37.9)  | 571        | 181 (31.6) | +17  | +40  |
| Gastroenterology | At least one, N (%) |              | 268 (0.7)  |             | 258 (0.7)  |            |      |      |
|                  | Total N             | First visits | 317        | 181 (57)    | 304        | 157 (51.6) | +4   | +15  |
| Diabetology      | At least one, N (%) |              | 1397 (3.9) |             | 1116 (3.1) |            |      |      |
|                  | Total N             | First visits | 1942       | 458 (23.6)  | 1500       | 320 (21.3) | +29  | +43  |
| Dermatology      | At least one, N (%) |              | 1470 (4.1) |             | 1407 (3.9) |            |      |      |
|                  | Total N             | First visits | 1670       | 501 (30.0)  | 1574       | 481 (30.5) | +6%  | +4   |
| Mental Health    | At least one, N (%) |              | 174 (0.5)  |             | 175 (0.5)  |            |      |      |
|                  | Total N             | First visits | 190        | 117 (61.6)  | 209        | 104 (49.5) | -9%  | +12  |
| Nephrology       | At least one, N (%) |              | 171 (0.5)  |             | 179 (0.5)  |            |      |      |
|                  | Total N             | First visits | 301        | 49 (16.3)   | 249        | 47 (18.9)  | +21  |      |

Hazard ratios, overall and by Charlson Index, are outlined in Table 2.

Table 2: Rates (x1,000 x month) of access to hospital care and outpatient specialist visits for convalescent covid-19 patients and the control group

|                                      |                       | Rates x<br>1000 | Rates Lower<br>95%CI | Rates Upper<br>95%CI | HR   | HR Lower<br>95%CI | HR Upper<br>95%CI | HR in Charlson<br>Index =0 (95%CI)* | HR in Charlson<br>Index =>1 (95%CI)* |
|--------------------------------------|-----------------------|-----------------|----------------------|----------------------|------|-------------------|-------------------|-------------------------------------|--------------------------------------|
| Non surgical h admissions            | control               | 3.8             | 3.5                  | 4.1                  | 1    |                   |                   | 1                                   | 1                                    |
|                                      | covid-19 convalescent | 5.2             | 4.9                  | 5.5                  | 1.38 | 1.25              | 1.52              | 1.11 (0.97-1.27)                    | 1.83 (1.73-2.14)                     |
| H admissions for respiratory disease | control               | 0.3             | 0.2                  | 0.4                  | 1    |                   |                   | 1                                   | 1                                    |
|                                      | covid-19 convalescent | 0.7             | 0.6                  | 0.9                  | 2.09 | 2.07              | 4.09              | 6.69 (2.84-15.7)                    | 2.3 (.57-3.36)                       |
| H admissions for heart disease       | control               | 0.4             | 0.3                  | 0.5                  | 1    |                   |                   | 1                                   | 1                                    |
|                                      | covid-19 convalescent | 0.8             | 0.7                  | 1.0                  | 1.93 | 1.46              | 2.55              | 1.49 (1.37-1.62)                    | 2.38 (1.62-3.5)                      |
| Accesses to Emergency Room           | control               | 1               | 17.4                 | 18.7                 | 1    |                   |                   | 1                                   | 1                                    |
|                                      | covid-19 convalescent | 24.4            | 23.7                 | 25.1                 | 1.36 | 1.29              | 1.42              | 1.32 (1.25-1.39)                    | 1.51 (1.36-1.66)                     |
| <b>Outpatient Specialist Visits</b>  |                       |                 |                      |                      |      |                   |                   |                                     |                                      |
| Pneumology                           | control               | 2,1             | 1,9                  | 2,4                  | 1    |                   |                   | 1                                   | 1                                    |
|                                      | covid-19 convalescent | 5,2             | 4,9                  | 5,6                  | 2,45 | 2,17              | 2,76              | 3.35 (3.09 -3.65)                   | 1.53 (1.36-1.71)                     |
| Cardiology                           | control               | 6,8             | 6,4                  | 7,2                  | 1    |                   |                   | 1                                   | 1                                    |
|                                      | covid-19 convalescent | 9,7             | 9,2                  | 10,2                 | 1,44 | 1,33              | 1,55              | 1.53 (1.36-1.71)                    | 1.23 (1.07-1.41)                     |
| Neurology                            | control               | 4,8             | 4,5                  | 5,2                  | 1    |                   |                   | 1                                   | 1                                    |
|                                      | covid-19 convalescent | 6               | 5,7                  | 6,4                  | 1,25 | 1,14              | 1,36              | 1.22 (1.1-1.35)                     | 1.37 (1.12-1.68)                     |
| Reumathology                         | control               | 3,2             | 3                    | 3,5                  | 1    |                   |                   | 1                                   | 1                                    |
|                                      | covid-19 convalescent | 3,8             | 3,5                  | 4,1                  | 1,17 | 1,05              | 1,31              | 1.19 (1.04 – 1.36)                  | 1.15 (0.93- 1.42)                    |
| Gastroenterology                     | control               | 1,7             | 1,5                  | 1,9                  | 1    |                   |                   | 1                                   | 1                                    |
|                                      | covid-19 convalescent | 1,8             | 1,6                  | 2,0                  | 1,04 | 0,89              | 1,22              | 1.0 (0.84-1.20)                     | 1.21 (0.85 -1.73)                    |
| Mental health                        | control               | 1,2             | 1                    | 1,4                  | 1    |                   |                   | 1                                   | 1                                    |
|                                      | covid-19 convalescent | 1,1             | 0,9                  | 1,2                  | 0,91 | 0,75              | 1,10              | 0.90 (0.73-1.11)                    | 0.97 (0.54-1.74)                     |
| Dermatology                          | control               | 8,9             | 8,5                  | 9,4                  | 1    |                   |                   | 1                                   | 1                                    |
|                                      | covid-19 convalescent | 9,5             | 9                    | 9,9                  | 1,06 | 0,99              | 1,14              | 1.06 (0.98 – 1.14)                  | 1.10 (0.92-1.31)                     |
| Endocrinology                        | control               | 8,5             | 8,0                  | 8,9                  | 1    |                   |                   | 1                                   | 1                                    |
|                                      | covid-19 convalescent | 11,0            | 10,5                 | 11,5                 | 1,30 | 1,21              | 1,39              | 1.28 (1.18 -1.40)                   | 1.34 1.19 -1.50)                     |

1  
2  
3 As shown, previous exposure to SARS-Cov-2 infection was always associated with a higher probability  
4 of needing access to hospital care which was more evident among those with Charlson Index  $\geq 1$ . The  
5  
6 only exception were hospitalisations for respiratory diseases, whose HR associated with previous SARS-  
7  
8 Cov-2 infection was higher among individuals without relevant comorbidities (HR:6.69 – 95%CI 2.84 –  
9  
10 15.7 vs HR: 2.30 – 95% 1,57 – 3,36 for those with Charlson Index  $\geq 1$ ), and access to Emergency Room,  
11  
12 whose HRs of the two subgroups were overlapping.  
13  
14  
15  
16  
17

18 The same pattern held true for outpatient services, for whom previous exposure to SARS-Cov2 infection  
19  
20 was always associated with higher probability of use but for gastrointestinal and mental health  
21  
22 specialist visits.  
23  
24  
25  
26  
27  
28

### 29 *Costs*

30  
31  
32 Overall, the cost of care provided to those who had a previous SARS-CoV2 infection was 27% higher  
33  
34 (10,357,221, mean : 287.41, range 0 – 114610.25, vs 8,149,96, mean 226,.6, range Euro). The  
35  
36 difference in cost between the two groups was more evident (+45%) among those with relevant  
37  
38 comorbidities (i.e. Charlson Index $\geq 1$ ) than among those with Charlson Index=0 (+17%) (see Table 3).  
39  
40  
41  
42  
43  
44  
45  
46  
47  
48  
49  
50  
51  
52  
53  
54  
55  
56  
57  
58  
59  
60



Table 3: cost of care (in Euro) for convalescent covid-19 patients and control cohort

|                              | Convalescent covid-19 |        |        |             | Control cohort |        |        |            |
|------------------------------|-----------------------|--------|--------|-------------|----------------|--------|--------|------------|
|                              | Total                 | Mean   | Median | Range       | Total          | Mean   | Median | Range      |
| <b>Overall</b>               | 10,357,221            | 287.41 | 23.0   | 0 – 114,610 | 8,149,196      | 226.14 | 14.0   | 0 – 69,143 |
| <b>Charlson Index 0</b>      | 6,318,301             | 194.0  | 18.0   | 0 – 114,610 | 5,380,207      | 165.23 | 4.0    | 0 – 45,510 |
| <b>Charlson Index &gt;=1</b> | 4,038,919             | 1162.3 | 159.0  | 0 – 74,440  | 2,768,989      | 796.83 | 137.0  | 0 – 69,143 |

Among those in the highest quartile of total costs (i.e.  $\geq 114,610$  Euro), 9670 (54%) had previous SARS-CoV2 infection. The relationship between their individual characteristics and the likelihood of being in the highest quartile of costs is outlined in Table 4, according to the logistic regression model employed. Factors representing degree of severity of SARS-CoV2 infection were associated with higher cost of care in the following months, in particular aging and degree of comorbidity. As for COVID related factors, subjects with hospital admission for covid19 and presence of symptoms at diagnosis had 66% and 32% higher probability of higher cost of care. On the contrary, those who had anti-SARS-CoV2 vaccination had 64% lower probability of falling in the highest costs quartile.

Table 4: characteristics of individuals who had SARS-CoV-2 infection associated with higher costs of care in the following months

| <b>Covariates</b>                         | <b>Odds Ratio</b> | <b>95% CI</b>  |
|-------------------------------------------|-------------------|----------------|
| <b>Sex</b> Female                         | 1                 |                |
| Male                                      | 0,67              | (0,63 to 0,71) |
| <b>Age</b> <= 30                          | 1                 |                |
| 31-50                                     | 2,17              | (2,01 to 2,34) |
| 51-70                                     | 3,71              | (3,44 to 4,00) |
| ≥ 71                                      | 4,75              | (4,32 to 5,23) |
| <b>Charlson Index</b> 0                   | 1                 |                |
| 1                                         | 2,09              | (1,86 to 2,36) |
| 2                                         | 2,96              | (2,60 to 3,39) |
| ≥3                                        | 4,00              | (3,42 to 4,78) |
| <b>Had anti-SARS-CoV2 vaccine</b>         |                   |                |
| No                                        | 1                 |                |
| Yes                                       | 0,36              | (0,30 to 0,43) |
| <b>Had Symptomatic infection</b>          |                   |                |
| No                                        | 1                 |                |
| Yes                                       | 1,32              | (1,23 to 1,41) |
| <b>Had hospital admission for covid19</b> |                   |                |
| No                                        | 1                 |                |
| Yes                                       | 1,66              | (1,50 to 1,83) |

## Discussion

This study provides data to assess the impact of SARS-Cov-2 infection on use of health services (hospital admissions and outpatient specialist visits) and on extra costs within 6 months from recovery in an Italian province. To date, this is the largest study providing details on ambulatory outpatient visits and hospital admissions associated with long-covid in specific clinical areas. A wider UK study provided details on the complementary issue of the long-term impact of COVID on General Practitioners consultations [12].

Our data show that in the six months after recovery, out of 1000 individuals, a previous COVID infection was associated with 139 additional accesses in emergency room, eight additional non-surgical hospital admission and two hospitalizations for respiratory disease and for heart disease. As for outpatient visits, there were 19 additional pneumology visits as well as 17 cardiology, 15 endocrinology, seven neurology and four more rheumatology visits. This is highly consistent with the higher incidence of related symptoms in post-COVID patients described in several studies. On the contrary, no increase was shown in rates of mental health, gastroenterology and dermatology visits, despite related symptoms have been frequently reported among long-COVID patterns. The latter findings are unexpected, especially regarding mental health services, and warrant further qualitative analysis to explore possible determinants of the observed pattern. Overall, in six months in our province there have been extra costs for more than 2,2 million euros (about 4 euros per capita) associated with post-covid sequelae.

Subgroup analyses indicate that increase in rates of non-surgical hospital admissions, hospitalizations for heart disease and accesses to emergency room is more pronounced in people with comorbidities, whereas an opposite pattern is observed for rate of hospitalizations for respiratory disease. This

1  
2  
3 counterintuitive finding may be due to the fact that such admissions are rarer in people without  
4  
5 comorbidities, so that their relative increase in post-COVID patients is more evident compared with  
6  
7 people that, among their comorbidities, may have a higher background rate of respiratory problems.  
8  
9  
10 The same reason may hold for the less pronounced increase in rates of pneumology and cardiology  
11  
12 outpatient visits among post-COVID patients with comorbidities. Further studies may help clarify  
13  
14 these points.  
15  
16

17  
18 Factors representing degree of severity of SARS-CoV2 infection (presence of symptoms at diagnosis,  
19  
20 hospital admission for covid19) were all associated with higher cost of care in the following months,  
21  
22 as well as age and degree of comorbidity. On the contrary, those who had anti-SARS-CoV2 vaccination  
23  
24 were associated with lower cost of care.  
25  
26

27  
28 Our observational data have been collected as part of patients' care: reimbursements to health  
29  
30 services depend on their completeness, which can be assumed, and which should exclude the  
31  
32 possibility of major biases. However, limits in the quality of administrative data cannot be excluded,  
33  
34 as well as the possibility of residual confounding. No scientific validation of the databases used and of  
35  
36 the record-linkage procedures is available, although the unique patient identification number present  
37  
38 in all the databases should ensure that no data is lost. As for generalizability, incidence of COVID in  
39  
40 our province since the start of the pandemic is similar to that in other areas of Northern Italy,  
41  
42 although higher than the mean Italian incidence (about 5,000 cases more out of 100,000 inhabitants)  
43  
44 [13].  
45  
46  
47  
48  
49

50  
51 In conclusion, many studies reported the frequency of post-COVID symptoms that recovered patients  
52  
53 suffered from. Our findings also reflect the burden of post-COVID sequelae, providing some specific  
54  
55 insight on their impact on the extra-use of health services according to patients' characteristics and  
56  
57

1  
2  
3 vaccination status. Vaccination is associated with lower cost of care following covid infection,  
4  
5 highlighting the favourable impact of vaccines on the use of health services even when they do not  
6  
7 prevent infection, in keeping with their capacity to reduce the clinical burden associated to SARS-CoV-  
8  
9 2 infection. Further studies should provide longer follow-up data, also with higher numbers of  
10  
11 vaccinated people to allow a comparison between those who developed COVID and those who do  
12  
13 not, and to warrant the inclusion of boosted people who could not be included in our cohort yet.  
14  
15  
16  
17  
18  
19  
20  
21  
22  
23  
24  
25  
26  
27  
28  
29  
30  
31  
32  
33  
34  
35  
36  
37  
38  
39  
40  
41  
42  
43  
44  
45  
46  
47  
48  
49  
50  
51  
52  
53  
54  
55  
56  
57  
58  
59  
60

### **Author contributions**

GF: conception and design, interpretation of data, drafting the article

MM conception and design, data analysis, revising the article critically for important intellectual content

DF: data analysis, revising the article critically for important intellectual content

RG: conception and design, data analysis, interpretation of data, drafting the article

All authors approved the version to be published and agree to be accountable for all aspects of the work in ensuring that questions related to the accuracy or integrity of any part of the work are appropriately investigated and resolved

The lead author\* affirms that this manuscript is an honest, accurate, and transparent account of the study being reported; that no important aspects of the study have been omitted; and that any discrepancies from the study as planned (and, if relevant, registered) have been explained.

\*The manuscript's guarantor.

**Competing interests:** all authors declare that they do not have competing interests

**Participant consent:** not required (anonymised study cohort in a database, the "Area Vasta Emilia Nord" Ethics Committee waived its need)

### ***Data sharing statement***

1  
2  
3 Data will be made available upon reasonable request to the Authors and in compliance with current  
4  
5 legislation for privacy protection. Requests should outline the objectives of the research and a protocol  
6  
7 for the analyses in order to have the transfer of the data approved by the local Ethics Committee.  
8  
9

10  
11 ***Role of the funding source***  
12

13  
14 The study did not receive any external funding. It was entirely supported by the Azienda Unità Sanitaria  
15  
16 Locale-IRCCS of Reggio Emilia, Reggio Emilia (Italy).  
17  
18  
19  
20  
21  
22  
23  
24  
25  
26  
27  
28  
29  
30  
31  
32  
33  
34  
35  
36  
37  
38  
39  
40  
41  
42  
43  
44  
45  
46  
47  
48  
49  
50  
51  
52  
53  
54  
55  
56  
57  
58  
59  
60

## References

1. Moynihan R, Sanders S, Michaleff ZA, et al. Impact of COVID-19 pandemic on utilisation of healthcare services: a systematic review. *BMJ Open* 2021;11:e045343. doi: 10.1136/bmjopen-2020-045343
2. World Health Organization. A clinical case definition of post COVID-19 condition by a Delphi consensus, 6 October 2021. [https://www.who.int/publications/i/item/WHO-2019-nCoV-Post\\_COVID-19\\_condition-Clinical\\_case\\_definition-2021.1](https://www.who.int/publications/i/item/WHO-2019-nCoV-Post_COVID-19_condition-Clinical_case_definition-2021.1)
3. National Institute for Health and Care Excellence (NICE), Scottish Intercollegiate Guidelines Network (SIGN) and Royal College of General Practitioners (RCGP). COVID-19 rapid guideline: managing the longterm effects of COVID-19. <https://www.nice.org.uk/guidance/ng188/resources/covid19-rapid-guideline-managing-the-longterm-effects-of-covid19-pdf-51035515742>
4. Groff D, Sun A, Ssentongo AE, et al. Short-term and Long-term Rates of Postacute Sequelae of SARS-CoV-2 Infection: A Systematic Review. *JAMA Netw Open*. 2021;4(10):e2128568. doi:10.1001/jamanetworkopen.2021.28568
5. Huang L, Yao Q, Gu X, Wang Q, Ren L, Wang Y, et al. 1-year outcomes in hospital survivors with COVID-19: a longitudinal cohort study. *Lancet* 2021;398:747-758
6. Davis HE, Assaf GS, McCorkell L, Wei H, Low RJ, Re'em Y, et al. Characterizing long COVID in an international cohort: 7 months of symptoms and their impact. *EClinicalMedicine* 2021;38:101019
7. Nehme M, Braillard O, Chappuis F, Courvosier DS, Guessous I, CoviCare Study Team. Prevalence of Symptoms More Than Seven Months After Diagnosis of Symptomatic COVID-19 in an Outpatient Setting. *Ann Intern Med* 2021;174:1252-1260
8. Heesakkers H, van der Hoeven JG, Corsten S, Janssen I, Ewalds E, Simons KS, Westerhof B, Rettig TCD, Jacobs C, van Santen S, Slooter AJC, van der Woude MCE, van den Boogaard M, Zegers M. Clinical Outcomes Among Patients With 1-Year Survival Following Intensive Care Unit Treatment for COVID-19. *JAMA* 2022 doi: 10.1001/jama.2022.0040
9. Giorgi Rossi P, Marino M, Formisano D, Venturelli F, Vicentini M, Grilli R; Reggio Emilia COVID-19 Working Group. Characteristics and outcomes of a cohort of COVID-19 patients in the Province of Reggio Emilia, Italy. *PLoS One*. 2020 Aug 27;15(8):e0238281. doi: 10.1371/journal.pone.0238281. PMID: 32853230; PMCID: PMC7451640.
10. Ragni P, Marino M, Formisano D, Bisaccia E, Scaltriti S, Bedeschi E, Grilli R. Association between Exposure to Influenza Vaccination and COVID-19 Diagnosis and Outcomes. *Vaccines (Basel)*. 2020 Nov 12;8(4):675
11. Charlson ME, Pompei P, Ales KL, et al. A new method of classifying prognostic comorbidity in longitudinal studies: development and validation. *J Chronic Dis* 1987;40:373–383
12. Whittaker H R, Gulea C, Koteci A, Kallis C, Morgan A D, Iwundu C et al. GP consultation rates for sequelae after acute covid-19 in patients managed in the community or hospital in the UK: population based study *BMJ* 2021; 375 :e065834 doi:10.1136/bmj-2021-065834
13. <https://www.nytimes.com/interactive/2021/world/italy-covid-cases.html> (last accessed: March 15, 2022)



STROBE Statement—Checklist of items that should be included in reports of *cohort studies*

|                              | Item No | Recommendation                                                                                                                                                                                                                                                                                                                              |
|------------------------------|---------|---------------------------------------------------------------------------------------------------------------------------------------------------------------------------------------------------------------------------------------------------------------------------------------------------------------------------------------------|
| <b>Title and abstract</b>    | 1       | Indicate the study's design with a commonly used term in the title or the abstract<br><b>Pag. 1, 3</b>                                                                                                                                                                                                                                      |
|                              |         | Provide in the abstract an informative and balanced summary of what was done and what was found<br><b>Pag. 3,4</b>                                                                                                                                                                                                                          |
| <b>Introduction</b>          |         |                                                                                                                                                                                                                                                                                                                                             |
| Background/rationale         | 2       | Explain the scientific background and rationale for the investigation being reported<br><b>Pag. 6,7</b>                                                                                                                                                                                                                                     |
| Objectives                   | 3       | State specific objectives, including any prespecified hypotheses<br><b>Pag. 6,7</b>                                                                                                                                                                                                                                                         |
| <b>Methods</b>               |         |                                                                                                                                                                                                                                                                                                                                             |
| Study design                 | 4       | Present key elements of study design early in the paper<br><b>Pag. 7</b>                                                                                                                                                                                                                                                                    |
| Setting                      | 5       | Describe the setting, locations, and relevant dates, including periods of recruitment, exposure, follow-up, and data collection<br><b>Pag. 7,8</b>                                                                                                                                                                                          |
| Participants                 | 6       | Give the eligibility criteria, and the sources and methods of selection of participants. Describe methods of follow-up<br><b>Pag. 7,8</b>                                                                                                                                                                                                   |
|                              |         | For matched studies, give matching criteria and number of exposed and unexposed<br><b>Pag. 8</b>                                                                                                                                                                                                                                            |
| Variables                    | 7       | Clearly define all outcomes, exposures, predictors, potential confounders, and effect modifiers. Give diagnostic criteria, if applicable<br><b>Pag. 7, 9, 10</b>                                                                                                                                                                            |
| Data sources/<br>measurement | 8*      | For each variable of interest, give sources of data and details of methods of assessment (measurement). Describe comparability of assessment methods if there is more than one group<br><b>Pag. 7 to 10</b>                                                                                                                                 |
| Bias                         | 9       | Describe any efforts to address potential sources of bias<br><b>Pag. 8 to 10</b>                                                                                                                                                                                                                                                            |
| Study size                   | 10      | Explain how the study size was arrived at<br><b>No formal calculation, descriptive study. Criteria for the cohort selection and follow-up are described in pag. 7,8</b>                                                                                                                                                                     |
| Quantitative variables       | 11      | Explain how quantitative variables were handled in the analyses. If applicable, describe which groupings were chosen and why<br><b>Pag. 9, 10</b>                                                                                                                                                                                           |
| Statistical methods          | 12      | (a) Describe all statistical methods, including those used to control for confounding<br>(b) Describe any methods used to examine subgroups and interactions<br>(c) Explain how missing data were addressed<br>(d) If applicable, explain how loss to follow-up was addressed<br>(e) Describe any sensitivity analyses<br><b>Pag. 9, 10</b> |
| <b>Results</b>               |         |                                                                                                                                                                                                                                                                                                                                             |
| Participants                 | 13*     | Report numbers of individuals at each stage of study—eg numbers potentially eligible, examined for eligibility, confirmed eligible, included in the study,                                                                                                                                                                                  |

|                          |     |                                                                                                                                                                                                                                    |
|--------------------------|-----|------------------------------------------------------------------------------------------------------------------------------------------------------------------------------------------------------------------------------------|
|                          |     | completing follow-up, and analysed<br><b>Pag. 8, 11</b>                                                                                                                                                                            |
|                          |     | Give reasons for non-participation at each stage<br><b>Not applicable</b>                                                                                                                                                          |
|                          |     | (c) Consider use of a flow diagram                                                                                                                                                                                                 |
| Descriptive data         | 14* | Give characteristics of study participants (eg demographic, clinical, social) and information on exposures and potential confounders<br><b>Pag. 8</b>                                                                              |
|                          |     | Indicate number of participants with missing data for each variable of interest<br><b>Not applicable</b>                                                                                                                           |
|                          |     | Summarise follow-up time (eg, average and total amount)<br><b>Pag. 11</b>                                                                                                                                                          |
| Outcome data             | 15* | Report numbers of outcome events or summary measures over time<br>Pag. 11, 12; tables I to IV                                                                                                                                      |
| Main results             | 16  | Give unadjusted estimates and, if applicable, confounder-adjusted estimates and their precision (eg, 95% confidence interval). Make clear which confounders were adjusted for and why they were included<br><b>Tables II to IV</b> |
|                          |     | Report category boundaries when continuous variables were categorized<br><b>Not applicable</b>                                                                                                                                     |
|                          |     | If relevant, consider translating estimates of relative risk into absolute risk for a meaningful time period<br><b>Pag. 13</b>                                                                                                     |
| Other analyses           | 17  | Report other analyses done—eg analyses of subgroups and interactions, and sensitivity analyses<br><b>Tables II to IV</b>                                                                                                           |
| <b>Discussion</b>        |     |                                                                                                                                                                                                                                    |
| Key results              | 18  | Summarise key results with reference to study objectives<br><b>Pag. 13, 14</b>                                                                                                                                                     |
| Limitations              | 19  | Discuss limitations of the study, taking into account sources of potential bias or imprecision. Discuss both direction and magnitude of any potential bias<br><b>Pag. 14</b>                                                       |
| Interpretation           | 20  | Give a cautious overall interpretation of results considering objectives, limitations, multiplicity of analyses, results from similar studies, and other relevant evidence<br><b>Pag. 14, 15</b>                                   |
| Generalisability         | 21  | Discuss the generalisability (external validity) of the study results<br><b>Pag. 14</b>                                                                                                                                            |
| <b>Other information</b> |     |                                                                                                                                                                                                                                    |
| Funding                  | 22  | Give the source of funding and the role of the funders for the present study and, if applicable, for the original study on which the present article is based<br><b>Pag. 10</b>                                                    |

\*Give information separately for exposed and unexposed groups.

**Note:** An Explanation and Elaboration article discusses each checklist item and gives methodological background and published examples of transparent reporting. The STROBE checklist is best used in conjunction with this article (freely available on the Web sites of PLoS Medicine at <http://www.plosmedicine.org/>, Annals of Internal Medicine at <http://www.annals.org/>, and Epidemiology at <http://www.epidem.com/>). Information on the STROBE Initiative is available at <http://www.strobe-statement.org>.

1  
2  
3  
4  
5  
6  
7  
8  
9  
10  
11  
12  
13  
14  
15  
16  
17  
18  
19  
20  
21  
22  
23  
24  
25  
26  
27  
28  
29  
30  
31  
32  
33  
34  
35  
36  
37  
38  
39  
40  
41  
42  
43  
44  
45  
46  
47  
48  
49  
50  
51  
52  
53  
54  
55  
56  
57  
58  
59  
60

For peer review only

# BMJ Open

## Patterns of utilisation of specialist care after SARS-Cov-2 infection: a retrospective cohort study

|                                 |                                                                                                                                                                                                                                                                                                                                                                                                                                                                                                                                                     |
|---------------------------------|-----------------------------------------------------------------------------------------------------------------------------------------------------------------------------------------------------------------------------------------------------------------------------------------------------------------------------------------------------------------------------------------------------------------------------------------------------------------------------------------------------------------------------------------------------|
| Journal:                        | <i>BMJ Open</i>                                                                                                                                                                                                                                                                                                                                                                                                                                                                                                                                     |
| Manuscript ID                   | bmjopen-2022-063493.R1                                                                                                                                                                                                                                                                                                                                                                                                                                                                                                                              |
| Article Type:                   | Original research                                                                                                                                                                                                                                                                                                                                                                                                                                                                                                                                   |
| Date Submitted by the Author:   | 08-Nov-2022                                                                                                                                                                                                                                                                                                                                                                                                                                                                                                                                         |
| Complete List of Authors:       | Formoso, Giulio; Azienda Unità Sanitaria Locale - IRCCS Tecnologie Avanzate e Modelli Assistenziali in Oncologia di Reggio Emilia, Clinical Governance Unit<br>Marino, Massimiliano; Azienda Unità Sanitaria Locale - IRCCS Tecnologie Avanzate e Modelli Assistenziali in Oncologia di Reggio Emilia<br>Formisano, Debora; Azienda Unità Sanitaria Locale - IRCCS Tecnologie Avanzate e Modelli Assistenziali in Oncologia di Reggio Emilia<br>Grilli, Roberto; Local Health Agency of Romagna, Unità Ricerca Valutativa e Policy Servizi Sanitari |
| <b>Primary Subject Heading</b>: | Health services research                                                                                                                                                                                                                                                                                                                                                                                                                                                                                                                            |
| Secondary Subject Heading:      | Public health, Epidemiology                                                                                                                                                                                                                                                                                                                                                                                                                                                                                                                         |
| Keywords:                       | Organisation of health services < HEALTH SERVICES ADMINISTRATION & MANAGEMENT, Clinical governance < HEALTH SERVICES ADMINISTRATION & MANAGEMENT, COVID-19, EPIDEMIOLOGY, PUBLIC HEALTH                                                                                                                                                                                                                                                                                                                                                             |
|                                 |                                                                                                                                                                                                                                                                                                                                                                                                                                                                                                                                                     |

SCHOLARONE™  
Manuscripts



I, the Submitting Author has the right to grant and does grant on behalf of all authors of the Work (as defined in the below author licence), an exclusive licence and/or a non-exclusive licence for contributions from authors who are: i) UK Crown employees; ii) where BMJ has agreed a CC-BY licence shall apply, and/or iii) in accordance with the terms applicable for US Federal Government officers or employees acting as part of their official duties; on a worldwide, perpetual, irrevocable, royalty-free basis to BMJ Publishing Group Ltd ("BMJ") its licensees and where the relevant Journal is co-owned by BMJ to the co-owners of the Journal, to publish the Work in this journal and any other BMJ products and to exploit all rights, as set out in our [licence](#).

The Submitting Author accepts and understands that any supply made under these terms is made by BMJ to the Submitting Author unless you are acting as an employee on behalf of your employer or a postgraduate student of an affiliated institution which is paying any applicable article publishing charge ("APC") for Open Access articles. Where the Submitting Author wishes to make the Work available on an Open Access basis (and intends to pay the relevant APC), the terms of reuse of such Open Access shall be governed by a Creative Commons licence – details of these licences and which [Creative Commons](#) licence will apply to this Work are set out in our licence referred to above.

Other than as permitted in any relevant BMJ Author's Self Archiving Policies, I confirm this Work has not been accepted for publication elsewhere, is not being considered for publication elsewhere and does not duplicate material already published. I confirm all authors consent to publication of this Work and authorise the granting of this licence.

1  
2  
3  
4  
5  
6  
7  
8  
9  
10  
11  
12  
13  
14  
15  
16  
17  
18  
19  
20  
21  
22  
23  
24  
25  
26  
27  
28  
29  
30  
31  
32  
33  
34  
35  
36  
37  
38  
39  
40  
41  
42  
43  
44  
45  
46  
47  
48  
49  
50  
51  
52  
53  
54  
55  
56  
57  
58  
59  
60

# Patterns of utilisation of specialist care after SARS-Cov-2 infection: a retrospective cohort study

## Authors:

Giulio Formoso <sup>1\*</sup>, MPH MPharm, Massimiliano Marino PhD <sup>1</sup>, Debora Formisano PhD <sup>1</sup>, Roberto Grilli

MD <sup>1,2</sup>

## Affiliations:

<sup>1</sup> Direzione Sanitaria, Azienda Unità Sanitaria Locale – IRCCS di Reggio Emilia, Reggio Emilia, Italy

<sup>2</sup> Unità Ricerca Valutativa e Policy Servizi Sanitari, AUSL della Romagna, via De Gasperi, 8, Ravenna,

Italy

**Correspondence to:** Giulio Formoso, e-mail: [giulio.formoso@ausl.re.it](mailto:giulio.formoso@ausl.re.it)

Address: Via Amendola 2; 42122 Reggio Emilia (Italy)

**Word count:** 2827 words

1  
2  
3 **Abstract** (word count: 300)  
4  
5  
6  
7  
8

9 **Objective:** to explore the pattern of health services utilisation of people who had a documented  
10 SARS-Cov-2 infection, after becoming negative to the swab test  
11  
12

13  
14 **Design:** retrospective cohort study  
15  
16

17 **Setting:** the Italian province of Reggio Emilia  
18  
19

20 **Participants:** 36,036 subjects who, after being diagnosed covid-19, did not die and were found negative  
21 during the period Sept 2020–March 2021. These were matched for age, sex and Charlson Index with an  
22 equal number of subjects never found positive at the SARS-Cov-2 swab test over the study period  
23  
24  
25

26  
27 **Main outcome measures:** hospital admissions for all medical conditions and for respiratory or  
28 cardiovascular conditions only; access to emergency room (for any cause); outpatient specialist visits  
29 (pneumology, cardiology, neurology, endocrinology, nephrology, dermatology, rehabilitation, mental  
30 health); overall cost of care  
31  
32  
33

34  
35  
36  
37 **Results:** within a median follow-up time of 152 days (range 1-180) previous exposure to SARS-Cov-2  
38 infection was always associated with higher probability of needing access to hospital or ambulatory  
39 care, except for dermatology, mental health, and gastroenterology specialist visits. Post-COVID subjects  
40 with Charlson Index  $\geq 1$  were hospitalized more frequently for heart disease and for non-surgical  
41 reasons than subjects with Charlson index =0, whereas the opposite occurred for hospitalisations for  
42 respiratory diseases and pneumology visits. A previous SARS-CoV2 infection was associated with 27%  
43 higher cost of care compared to people never infected. The difference in cost was more evident among  
44  
45  
46  
47  
48  
49  
50  
51  
52  
53  
54  
55  
56  
57

1  
2  
3 those with Charlson Index $\geq$ 1. Subjects who had anti-SARS-CoV2 vaccination had lower probability of  
4  
5 falling in the highest cost quartile.  
6  
7

8 **Conclusions:** our findings reflect the burden of post-COVID sequelae, providing some specific insight on  
9  
10 their impact on the extra-use of health services according to patients' characteristics and vaccination  
11  
12 status. Vaccination is associated with lower cost of care following covid infection, highlighting the  
13  
14 favourable impact of vaccines on the use of health services even when they do not prevent infection.  
15  
16  
17

### 21 **Strengths and limitations of this study**

- 24 • Our study provide insight on the extra-use of specific health services and related cost of care by  
25 COVID patients after they have recovered, compared to people never infected by SARS-Cov-2
- 28 • Subgroup analyses provide further insight on how demographic/clinical characteristics and  
30 vaccination status are associated with use of health services.
- 34 • Limits in the quality of administrative data cannot be excluded, as well as the possibility of  
35 residual confounding.
- 38 • Further studies should provide longer follow-up data, also with higher numbers of vaccinated  
40 people to allow a comparison between those who developed COVID and those who do not,  
42 and to warrant the inclusion of boosted people who could not be included in our cohort yet.



## Introduction

The SARS-Cov-2 pandemic forced radical changes in the organization and delivery of care, requiring a rapid expansion of health services capacity in some sectors (i.e. additional hospital beds in general and intensive care units in particular), the adoption and implementation of public health measures and interventions for efficient identification of new case and contact tracing, and the reorganization of primary care services to allow covid-19 patients to be cared for as much as possible at home. As it has been described, these changes had been at the expense of the management of other diseases, being the volume of procedures and interventions for conditions other than covid-19 drastically reduced [1].

However, the pandemic could have also long-term implications for health care systems, generating additional health care needs in individuals who have been diagnosed covid-19. Indeed, after SARS-Cov-2 infection a variable proportion of individuals experience a condition defined as “post covid-19 syndrome”, or “long covid-19”, with the persistence of signs and symptoms (or occurrence of new symptoms) after one to three months from the end of the acute phase [2,3]. In particular, cohort studies and systematic reviews have described the persistence of several symptoms including neurologic disorders (e.g. the so called “brain fog”, ageusia/anosmia), mental health disorders (e.g. anxiety, depression, sleep problems), functional impairment, respiratory, cardiac, digestive and skin disorders, etc. Although their incidence is widely variable across studies and depends on the background health status and on the initial COVID symptomatology, some of these symptoms (in particular, respiratory and neurologic disorders) can affect up to half to three-quarters of recovered patients [4-8].

In this study, conducted in the Italian province of Reggio Emilia (population 539,652), we assessed the additional burden (if any) to health services due to the management of those who had a documented

1  
2  
3 SARS-Cov-2 infection, exploring their pattern of specific inpatient and outpatient health services  
4  
5 utilisation after becoming negative to the swab test.  
6  
7  
8  
9

## 10 11 **Methods**

### 12 13 14 *Study design*

15  
16  
17 We conducted a retrospective cohort study in which individuals from the resident population who  
18  
19 had a negative PCR on naso- and oropharyngeal swab test for SARS-Cov-2, after having been found  
20  
21 positive at the same test, were followed up over time and their rates of health services utilization  
22  
23 assessed and compared with a matched cohort of residents never found positive at the SARS-Cov-2  
24  
25 test.  
26  
27  
28  
29

### 30 31 *Study population and data sources*

32  
33 Since the inception of the pandemic in March 2020, a surveillance database has been implemented in  
34  
35 the province, including all the citizens undergoing SARS-Cov-2 swab test and its result. [9, 10] For this  
36  
37 study, we identified from the SARS-Cov-2 surveillance database all those who, after being diagnosed  
38  
39 covid-19, did not die and were found negative during the period Sept 2020 – March 2021. These  
40  
41 individuals (n= 36,036) represented the cohort of those who previously had a documented SARS-Cov-2  
42  
43 infection.  
44  
45  
46  
47

48 Through record linkage procedures between the SARS-CoV-2 database and the administrative  
49  
50 databases available to the Local Health Authority, we then assessed their rates of use of health services  
51  
52 from the date of the negative swab test (index date) up to June 30, 2021.  
53  
54  
55  
56  
57

1  
2  
3 The administrative databases include, for each resident in the province, demographic information,  
4  
5 hospital discharge data (coded according to the International Classification of Diseases-9-CM [ICD-9-  
6  
7 CM]) of diagnosis and procedures, admission and discharge dates, vital status at discharge, and  
8  
9 outpatient pharmacy data at the individual prescription level, as well as access to outpatient  
10  
11 ambulatory care. Data were anonymized, and record linkage procedures were performed according to  
12  
13 the unique identification number which is assigned to each resident. In addition, for each individual,  
14  
15 we searched for information on previous hospitalisations (up to preceding 10 years), as registered in  
16  
17 these local administrative databases, in order to assess the presence of specific comorbidities  
18  
19 individually (chronic obstructive pulmonary disease, arrhythmia, diabetes, acute myocardial infraction,  
20  
21 heart failure, vascular diseases, obesity), and to estimate individual patients' overall degree of  
22  
23 comorbidity (if any), according to the (not age-adjusted) Charlson index.[11]  
24  
25  
26  
27  
28  
29

30 Relying on the same data sources, we identified individuals to be included in the control group among  
31  
32 residents alive at Jan 1<sup>st</sup> 2020 and never found positive at the SARS-Cov-2 swab test over the study  
33  
34 period (either with negative tests or with no test at all). Individuals in the control group were matched  
35  
36 according to age, sex, and Charlson Index (in four classes: 0, 1, 2 and  $\geq 3$ ). Each control had the same  
37  
38 index date of the matched SARS-Cov-2 infected individual. Therefore, the matching procedure made  
39  
40 available 36,036 persons for each cohort, with equal distribution as for sex (18,481 were female,  
41  
42 51.3%), age (mean 43, range 1-103), comorbidities (32,561 had Charlson Index 0, while 1391, 1146 and  
43  
44 938 had Charlson Index 1, 2 and  $\geq 3$ , respectively).  
45  
46  
47  
48  
49

50 People who died before the end of study were censored at the time of death.  
51  
52

### 53 *Outcome measures*

54  
55  
56  
57

1  
2  
3 The following items of care provided over the study period were considered, taking into account the  
4  
5 most common symptoms persisting after the acute phase of covid-19 disease.[3]  
6  
7

- 8 - Hospital admissions for all medical conditions;
- 9
- 10 - Hospital admissions for respiratory or cardiovascular conditions only;
- 11
- 12 - Access to Emergency Room (for any cause);
- 13
- 14 - Outpatient specialist visits (pneumology, cardiology, neurology, endocrinology, nephrology,  
15  
16 dermatology, rehabilitation, mental health).  
17  
18  
19  
20

21 The cost of individual procedures and services (according to official fees) and of drugs was taken as  
22  
23 overall measure of the burden to the regional health care system of the care provided to individuals in  
24  
25 both the cohorts. In cost analysis, in addition to the above reported items of care, we considered also  
26  
27 all the outpatient diagnostic procedures and tests (i.e. blood tests, chest x-ray, etc.) and drug  
28  
29 prescriptions.  
30  
31  
32  
33

### 34 *Statistical analyses*

35  
36  
37 Descriptive analysis of the items of care provided to individuals in the two cohorts are reported, as well  
38  
39 as Poisson rates with 95% confidence intervals (95%CI). Rates have the total number of episodes of care  
40  
41 observed as numerator, and person-months as denominator.  
42  
43  
44

45 The strength of the association between previous SARS-Cov-2 infection and rates of use of the items of  
46  
47 care considered was assessed through Hazard Ratios (HR). In order to better disentangle the effect of  
48  
49 the previous SARS-Cov-2 infection, rather than of coexisting diseases, we stratified the analysis by  
50  
51 Charlson comorbidity index, thus estimating HRs separately for convalescent covid-19 patients and  
52  
53 control individuals with Charlson Index =0 and with Charlson Index  $\geq 1$ . We also calculated separate  
54  
55  
56  
57

1  
2  
3 HRs considering controls who either had negative test or no test at all, and HRs for outpatient visits,  
4  
5 hospital and emergency room admissions in the first 90 days and after 90 days from the index date, to  
6  
7 assess their trend over time.  
8  
9

10  
11 Mean case vs control cost differences (with 95%CI) are reported overall and according to age, sex, and  
12  
13 Charlson Index. Total cost of care was divided in quartiles and the association between the  
14  
15 characteristics of those who had SARS-Cov-2 infection and higher costs was assessed through a logistic  
16  
17 regression model, with the highest costs quartile as dependent variable, and age (in categorised in four  
18  
19 classes:  $\leq 30$ , 31-50, 51-70,  $\geq 71$ ), sex, presence of symptoms at diagnosis and hospital admission for  
20  
21 covid-19 (both proxy indicators of covid-19 severity), and pre-existence of specific comorbidities as  
22  
23 covariates. As 986 (3%) of those who had SARS-CoV-2 infection had also received SARS-Cov-2  
24  
25 vaccination before testing positive at the swab test, we included SARS-Cov-2 vaccination status among  
26  
27 the covariates.  
28  
29  
30  
31  
32  
33  
34  
35

36 ***Patient and public involvement:*** none  
37  
38  
39  
40  
41  
42  
43  
44  
45  
46  
47  
48  
49  
50  
51  
52  
53  
54  
55  
56  
57

## Results

After a median follow-up of 152 days (range 1-180), 51 and 186 individuals died, in the control and the SARS-Cov-2 positive group, respectively. Among those who had been positive at the swab test, 16,286 (45%) individuals did not use hospital care and never accessed outpatient services, vs 18,055 (50%) in the control group ( $\chi^2_{1df} = 174.65$ ;  $p < 0.001$ ).

Both the proportion of individuals having at least one access at the items of care considered and the overall frequency of use was always higher in the SARS-Cov-2 positive cohort, especially for respiratory and cardiovascular hospital admissions and outpatients visits. Dermatology, mental health, and gastroenterology specialist visits have a different pattern, being the difference between the two groups negligible, if any. (Table 1)

*Table 1: frequency of use of hospital and ambulatory care by a cohort of 36036 convalescent covid-19 patients vs a matched control cohort, in the Province of Reggio Emilia (Italy).*

|                                     |                     | Convalescent Covid- |      | Matched Control |      | %Difference |           |
|-------------------------------------|---------------------|---------------------|------|-----------------|------|-------------|-----------|
| In H for respiratory disease        | Total N admissions  | 126                 |      | 45              |      | +180%       |           |
| In H for heart disease              | Total N admissions  | 143                 |      | 76              |      | +88%        |           |
| In H for any medical reason         | At least one, N (%) | 724 (2.0)           |      | 538 (1.5)       |      |             |           |
|                                     | Total N admissions  | 916                 |      | 675             |      | +36%        |           |
| Access to Emergency Room            | At least one, N (%) | 3383 (9.4)          |      | 2491 (6.9)      |      |             |           |
|                                     | Total N accesses    | 4299                |      | 3186            |      | +35%        |           |
| <b>Outpatient specialist visits</b> |                     |                     |      |                 |      |             |           |
| Pneumology                          | At least one, N (%) | 766 (2.0)           |      | 310 (0.9)       |      |             |           |
|                                     | Total N             | First visits        | 924  | 572 (61.9)      | 380  | 154 (40.5)  | +143 +271 |
| Cardiology                          | At least one, N (%) | 1588 (4.4)          |      | 1119 (3.0)      |      |             |           |
|                                     | Total N             | First visits        | 1708 | 1173 (68.7)     | 1198 | 716 (59.7)  | +43 +64   |

|                  |                     |              |            |            |            |            |     |     |
|------------------|---------------------|--------------|------------|------------|------------|------------|-----|-----|
| Neurology        | At least one, N (%) |              | 758 (2.1)  |            | 625 (1.7)  |            |     |     |
|                  | Total N             | First visits | 939        | 568 (60.5) | 756        | 424 (56.1) | +24 | +34 |
| Rheumatology     | At least one, N (%) |              | 533 (1.5)  |            | 461 (1.3)  |            |     |     |
|                  | Total N             | First visits | 670        | 254 (37.9) | 571        | 181 (31.6) | +17 | +40 |
| Gastroenterology | At least one, N (%) |              | 268 (0.7)  |            | 258 (0.7)  |            |     |     |
|                  | Total N             | First visits | 317        | 181 (57)   | 304        | 157 (51.6) | +4  | +15 |
| Diabetology      | At least one, N (%) |              | 1397 (3.9) |            | 1116 (3.1) |            |     |     |
|                  | Total N             | First visits | 1942       | 458 (23.6) | 1500       | 320 (21.3) | +29 | +43 |
| Dermatology      | At least one, N (%) |              | 1470 (4.1) |            | 1407 (3.9) |            |     |     |
|                  | Total N             | First visits | 1670       | 501 (30.0) | 1574       | 481 (30.5) | +6% | +4  |
| Mental Health    | At least one, N (%) |              | 174 (0.5)  |            | 175 (0.5)  |            |     |     |
|                  | Total N             | First visits | 190        | 117 (61.6) | 209        | 104 (49.5) | -9% | +12 |
| Nephrology       | At least one, N (%) |              | 171 (0.5)  |            | 179 (0.5)  |            |     |     |
|                  | Total N             | First visits | 301        | 49 (16.3)  | 249        | 47 (18.9)  | +21 |     |

Hazard ratios, overall and by Charlson Index, are outlined in Table 2.

Table 2: Rates (x1,000 x month) of access to hospital care and outpatient specialist visits for convalescent covid-19 patients and the control group

|                                      |                       | Rates x<br>1000 | Rates Lower<br>95%CI | Rates Upper<br>95%CI | HR   | HR Lower<br>95%CI | HR Upper<br>95%CI | HR in Charlson<br>Index =0 (95%CI)* | HR in Charlson<br>Index =>1 (95%CI)* |
|--------------------------------------|-----------------------|-----------------|----------------------|----------------------|------|-------------------|-------------------|-------------------------------------|--------------------------------------|
| Non surgical h admissions            | control               | 3.8             | 3.5                  | 4.1                  | 1    |                   |                   | 1                                   | 1                                    |
|                                      | covid-19 convalescent | 5.2             | 4.9                  | 5.5                  | 1.38 | 1.25              | 1.52              | 1.11 (0.97-1.27)                    | 1.83 (1.73-2.14)                     |
| H admissions for respiratory disease | control               | 0.3             | 0.2                  | 0.4                  | 1    |                   |                   | 1                                   | 1                                    |
|                                      | covid-19 convalescent | 0.7             | 0.6                  | 0.9                  | 2.09 | 2.07              | 4.09              | 6.69 (2.84-15.70)                   | 2.30 (1.57-3.36)                     |
| H admissions for heart disease       | control               | 0.4             | 0.3                  | 0.5                  | 1    |                   |                   | 1                                   | 1                                    |
|                                      | covid-19 convalescent | 0.8             | 0.7                  | 1.0                  | 1.93 | 1.46              | 2.55              | 1.49 (1.37-1.62)                    | 2.38 (1.62-3.50)                     |
| Accesses to Emergency Room           | control               | 1               | 17.4                 | 18.7                 | 1    |                   |                   | 1                                   | 1                                    |
|                                      | covid-19 convalescent | 24.4            | 23.7                 | 25.1                 | 1.36 | 1.29              | 1.42              | 1.32 (1.25-1.39)                    | 1.51 (1.36-1.66)                     |
| <b>Outpatient Specialist Visits</b>  |                       |                 |                      |                      |      |                   |                   |                                     |                                      |
| Pneumology                           | control               | 2,1             | 1,9                  | 2,4                  | 1    |                   |                   | 1                                   | 1                                    |
|                                      | covid-19 convalescent | 5,2             | 4,9                  | 5,6                  | 2,45 | 2,17              | 2,76              | 3.35 (3.09-3.65)                    | 1.53 (1.36-1.71)                     |
| Cardiology                           | control               | 6,8             | 6,4                  | 7,2                  | 1    |                   |                   | 1                                   | 1                                    |
|                                      | covid-19 convalescent | 9,7             | 9,2                  | 10,2                 | 1,44 | 1,33              | 1,55              | 1.53 (1.36-1.71)                    | 1.23 (1.07-1.41)                     |
| Neurology                            | control               | 4,8             | 4,5                  | 5,2                  | 1    |                   |                   | 1                                   | 1                                    |
|                                      | covid-19 convalescent | 6               | 5,7                  | 6,4                  | 1,25 | 1,14              | 1,36              | 1.22 (1.10-1.35)                    | 1.37 (1.12-1.68)                     |
| Reumatology                          | control               | 3,2             | 3                    | 3,5                  | 1    |                   |                   | 1                                   | 1                                    |
|                                      | covid-19 convalescent | 3,8             | 3,5                  | 4,1                  | 1,17 | 1,05              | 1,31              | 1.19 (1.04 – 1.36)                  | 1.15 (0.93- 1.42)                    |
| Gastroenterology                     | control               | 1,7             | 1,5                  | 1,9                  | 1    |                   |                   | 1                                   | 1                                    |
|                                      | covid-19 convalescent | 1,8             | 1,6                  | 2,0                  | 1,04 | 0,89              | 1,22              | 1.00 (0.84-1.20)                    | 1.21 (0.85 -1.73)                    |
| Mental health                        | control               | 1,2             | 1                    | 1,4                  | 1    |                   |                   | 1                                   | 1                                    |
|                                      | covid-19 convalescent | 1,1             | 0,9                  | 1,2                  | 0,91 | 0,75              | 1,10              | 0.90 (0.73-1.11)                    | 0.97 (0.54-1.74)                     |
| Dermatology                          | control               | 8,9             | 8,5                  | 9,4                  | 1    |                   |                   | 1                                   | 1                                    |
|                                      | covid-19 convalescent | 9,5             | 9                    | 9,9                  | 1,06 | 0,99              | 1,14              | 1.06 (0.98 – 1.14)                  | 1.10 (0.92-1.31)                     |
| Endocrinology                        | control               | 8,5             | 8,0                  | 8,9                  | 1    |                   |                   | 1                                   | 1                                    |
|                                      | covid-19 convalescent | 11,0            | 10,5                 | 11,5                 | 1,30 | 1,21              | 1,39              | 1.28 (1.18 -1.40)                   | 1.34 1.19 -1.50)                     |



1  
2  
3 As shown, previous exposure to SARS-Cov-2 infection was always associated with a higher probability  
4 of needing access to hospital care which was more evident among those with Charlson Index  $\geq 1$ . The  
5  
6 only exception were hospitalizations for respiratory diseases, whose HR associated with previous SARS-  
7  
8 Cov-2 infection was higher among individuals without relevant comorbidities (HR:6.69 – 95%CI 2.84 –  
9  
10 15.70 vs HR: 2.30 – 95% 1.57 – 3.36 for those with Charlson Index  $\geq 1$ ), and access to Emergency Room,  
11  
12 whose HRs of the two subgroups were overlapping.  
13  
14  
15  
16  
17

18 The same pattern held true for outpatient services, for whom previous exposure to SARS-Cov2 infection  
19  
20 was always associated with higher probability of use but for gastrointestinal and mental health  
21  
22 specialist visits.  
23  
24  
25

26 Risk of hospital and emergency room accesses and outpatient visits were highest for covid subjects  
27  
28 compared to controls who did not have swab tests (Figure 1 and Table 3). A decline in HRs after 90 days  
29  
30 from the index date was observed, although this decline was statistically significant only for hospital  
31  
32 admissions when covid subjects were compared to controls who did not have swab tests (Figure 1).  
33  
34  
35  
36 Subjects with higher Charlson index are more likely to have been tested. At the same time younger  
37  
38 people are more likely to have been tested (Table 4).  
39  
40  
41  
42  
43  
44  
45  
46  
47  
48  
49  
50  
51  
52  
53  
54  
55  
56  
57  
58  
59  
60

**Table 3.** HRs (from Poisson regression) comparing rates of occurrence of the events considered between Covid19 convalescents and matched controls who had no swab test and who had at least one (negative) swab test.

|                          | <u>Covid convalescents vs Controls who never had swab test</u> |              | <u>Covid convalescents vs Controls who had swab test (negative)</u> |              | <u>Overall</u> |              |
|--------------------------|----------------------------------------------------------------|--------------|---------------------------------------------------------------------|--------------|----------------|--------------|
|                          | <u>HR</u>                                                      | <u>95%CI</u> | <u>HR</u>                                                           | <u>95%CI</u> | <u>HR</u>      | <u>95%CI</u> |
| <u>H admissions</u>      | 1.34                                                           | 1.23 to 1.45 | 1.09                                                                | 0.96 to 1.23 | 1.25           | 1.17 to 1.34 |
| <u>AE access</u>         | 1.42                                                           | 1.34 to 1.50 | 1.17                                                                | 1.08 to 1.26 | 1.33           | 1.27 to 1.39 |
| <u>Outpatient visits</u> | 1.23                                                           | 1.21 to 1.23 | 1.09                                                                | 1.08 to 1.11 | 1.18           | 1.17 to 1.19 |

**Table 4.** Odds ratios of being tested for covid within the control cohort (logistic model)

| <u>Covariates</u> | <u>Odds Ratio</u> | <u>(95% Conf. Int.)</u> |
|-------------------|-------------------|-------------------------|
| Age <30           | 1                 |                         |
| 31-50             | 0.61              | (0.58 to 0.64)          |
| 51-70             | 0.43              | (0.40 to 0.45)          |
| >71               | 0.36              | (0.33 to 0.40)          |
| Charlson Index 0  | 1                 |                         |
| 1                 | 1.32              | (1.17 to 1.49)          |
| 2                 | 1.22              | (1.07 to 1.39)          |
| 3                 | 1.37              | (1.17 to 1.59)          |
| Sex female        | 1                 |                         |
| male              | 0.93              | (0.89 to 0.97)          |

We checked pattern of accesses in the year before the index date as well, focusing on those outpatient visits occurring more frequently, to strengthen the comparability of the two cohorts in terms of health-seeking behavior. No differences were observed (Table 5).

**Table 5.** % of access to the main outpatient specialist visits for convalescent covid-19 patients and the control group in the year preceding the index date

| Outpatient specialist visits* | Covid cohort (n=36,036) | Control cohort (n=36,036) |
|-------------------------------|-------------------------|---------------------------|
| Pneumology                    | 5.97%                   | 5.64%                     |
| Cardiology                    | 5.48%                   | 5.73%                     |
| Neurology                     | 3.28%                   | 3.33%                     |
| Mental health                 | 0.72%                   | 0.90%                     |

\*No statistically significant differences ( $p < 0.05$ ) were found

### Costs

Overall, the cost of care provided to those who had a previous SARS-CoV2 infection was 27% higher (10,357,221 Euro, mean: 287.41, range 0 – 114,610, vs 8,149,196, mean 226.14, range 0 – 69,143). The difference in cost between the two groups was more evident (+45%) among those with relevant comorbidities (i.e. Charlson Index $\geq$ 1) than among those with Charlson Index=0 (+17%) (Table 6).

Table 6: cost of care (in Euro) for convalescent covid-19 patients and control cohort

|                              | Convalescent covid-19 |        |        |             | Control cohort |        |        |            |
|------------------------------|-----------------------|--------|--------|-------------|----------------|--------|--------|------------|
|                              | Total                 | Mean   | Median | Range       | Total          | Mean   | Median | Range      |
| <b>Overall</b>               | 10,357,221            | 287.41 | 23.0   | 0 – 114,610 | 8,149,196      | 226.14 | 14.0   | 0 – 69,143 |
| <b>Charlson Index 0</b>      | 6,318,301             | 194.0  | 18.0   | 0 – 114,610 | 5,380,207      | 165.23 | 4.0    | 0 – 45,510 |
| <b>Charlson Index &gt;=1</b> | 4,038,919             | 1162.3 | 159.0  | 0 – 74,440  | 2,768,989      | 796.83 | 137.0  | 0 – 69,143 |

Among those in the highest quartile of total costs (i.e.  $\geq 114,610$  Euro), 9,670 (54%) had previous SARS-CoV2 infection. The relationship between their individual characteristics and the likelihood of being in the highest quartile of costs is outlined in Table 7, according to the logistic regression model employed. Factors representing degree of severity of SARS-CoV2 infection were associated with higher cost of care in the following months, in particular aging and degree of comorbidity. As for COVID related factors, subjects with hospital admission for covid19 and presence of symptoms at diagnosis had 66% and 32% higher probability of higher cost of care. On the contrary, those who had anti-SARS-CoV2 vaccination had 64% lower probability of falling in the highest costs quartile.

Table 7: characteristics of individuals who had SARS-CoV-2 infection associated with higher costs of care in the following months

| <b>Covariates</b>                         | <b>Odds Ratio</b> | <b>95% CI</b>  |
|-------------------------------------------|-------------------|----------------|
| <b>Sex</b> Female                         | 1                 |                |
| Male                                      | 0.67              | (0.63 to 0.71) |
| <b>Age</b> <= 30                          | 1                 |                |
| 31-50                                     | 2.17              | (2.01 to 2.34) |
| 51-70                                     | 3.71              | (3.44 to 4.00) |
| ≥ 71                                      | 4.75              | (4.32 to 5.23) |
| <b>Charlson Index</b> 0                   | 1                 |                |
| 1                                         | 2.09              | (1.86 to 2.36) |
| 2                                         | 2.96              | (2.60 to 3.39) |
| ≥3                                        | 4.00              | (3.42 to 4.78) |
| <b>Had anti-SARS-CoV2 vaccine</b>         |                   |                |
| No                                        | 1                 |                |
| Yes                                       | 0.36              | (0.30 to 0.43) |
| <b>Had Symptomatic infection</b>          |                   |                |
| No                                        | 1                 |                |
| Yes                                       | 1.32              | (1.23 to 1.41) |
| <b>Had hospital admission for covid19</b> |                   |                |
| No                                        | 1                 |                |
| Yes                                       | 1.66              | (1.50 to 1.83) |

## Discussion

This study provides data to assess the impact of SARS-Cov-2 infection on use of specific specialist care (hospital admissions and outpatient specialist visits) and on related extra costs within 6 months from recovery on a large cohort from an Italian province. Unfortunately, we could not include data on primary care encounters since in Italy they are not traceable.

Our data show that in the six months after recovery, out of 1,000 individuals, a previous COVID infection was associated with 139 additional accesses in emergency room, eight additional non-surgical hospital admission and two hospitalizations for respiratory disease and for heart disease. As for outpatient visits, there were 19 additional pneumology visits as well as 17 cardiology, 15 endocrinology, seven neurology and four more rheumatology visits. This is highly consistent with the higher incidence of related symptoms in post-COVID patients described in several studies. On the contrary, no increase was shown in rates of mental health, gastroenterology and dermatology visits, despite related symptoms have been frequently reported among long-COVID patterns. The latter findings may be unexpected, especially regarding mental health services, although also studies carried out in Norway did not find a higher use of these services in the post-covid period. [12,13] Further qualitative analyses are warranted to explore possible determinants of the observed pattern, also considering accessibility to services.

HRs related to people who had never tested are higher than HRs related to people with at least one negative test. The latter may be at higher risk for clinical sequelae and this may be the reason why they are more likely to be tested. This hypothesis is also supported by a logistic model using the subjects in the control cohort: those with higher Charlson index are more likely to have been tested.

At the same time younger people are more likely to have been tested (they are more likely to be

1  
2  
3 socially involved), while older people are less (they are more likely to have been kept isolated in those  
4  
5 months). For covid patients, risk of outpatient visits and of hospital or emergency room accesses was  
6  
7 (or tended to be) lower after 90 days from the negative test. Overall, in six months in our province  
8  
9 there have been extra costs for more than 2.2 million euros (about 4 euros per capita) associated with  
10  
11 post-covid sequelae.  
12  
13

14  
15 Subgroup analyses indicate that increase in rates of non-surgical hospital admissions, hospitalizations  
16  
17 for heart disease and accesses to emergency room is more pronounced in people with comorbidities,  
18  
19 whereas an opposite pattern is observed for rate of hospitalizations for respiratory disease. This  
20  
21 counterintuitive finding may be due to the fact that such admissions are rarer in people without  
22  
23 comorbidities, so that their relative increase in post-COVID patients is more evident compared with  
24  
25 people that, among their comorbidities, may have a higher background rate of respiratory problems.  
26  
27 The same reason may hold for the less pronounced increase in rates of pneumology and cardiology  
28  
29 outpatient visits among post-COVID patients with comorbidities. Further studies may help clarify  
30  
31 these points.  
32  
33  
34  
35  
36  
37

38 Factors representing degree of severity of SARS-CoV2 infection (presence of symptoms at diagnosis,  
39  
40 hospital admission for covid19) were all associated with higher cost of care in the following months,  
41  
42 as well as age and degree of comorbidity. On the contrary, those who had anti-SARS-CoV2 vaccination  
43  
44 were associated with lower cost of care.  
45  
46  
47

48 Our hypothesis is that it was the covid that brought the positives to a subsequent greater use of  
49  
50 services, but we cannot assume (only through the adjustment for age, sex and Charlson Index) that  
51  
52 they were comparable in this regard also before: those who do not have a positive test may be more  
53  
54 careful in lifestyles (and more likely to be able to avoid covid, as well as be more likely to be visited) or  
55  
56  
57  
58  
59  
60

1  
2  
3 vice versa avoid tampons and visits. Therefore, we did an additional analysis confirming that the two  
4  
5 cohorts did not differ in terms of ambulatory visits, so that their health-seeking behavior could be  
6  
7 considered comparable.  
8  
9

10  
11 We acknowledge potential risks of misclassification, although in Italy an exit test was mandatory and  
12  
13 the risk of having “non-recovered” positives is extremely low. In any case, all people in the “positive  
14  
15 test” cohort have been included if they did have a subsequent negative test. Also, we did not use a  
16  
17 time window but started the follow-up from the negative test. The assumption is that those who have  
18  
19 been negativized cannot be in an acute phase (or that it is unlikely to do a further test during the  
20  
21 acute phase to check if one has been negativized). This may bring a risk of misclassification too,  
22  
23 although we consider it very small and not higher than the risk of missing cases which could occur  
24  
25 within a time window.  
26  
27  
28  
29  
30

31  
32 Our observational data have been collected as part of patients’ care: reimbursements to health  
33  
34 services depend on completeness of these data, which can be assumed, and which should exclude the  
35  
36 possibility of major biases. However, limits in the quality of administrative data cannot be excluded,  
37  
38 as well as the possibility of residual confounding. No scientific validation of the databases used and of  
39  
40 the record-linkage procedures is available, although the unique patient identification number present  
41  
42 in all the databases should ensure that no data is lost. As for generalizability, incidence of COVID in  
43  
44 our province since the start of the pandemic is similar to that in other areas of Northern Italy,  
45  
46 although higher than the mean Italian incidence (about 5,000 cases more out of 100,000 inhabitants)  
47  
48  
49 [14].  
50  
51  
52  
53

54  
55 In conclusion, many studies reported the frequency of post-COVID symptoms that recovered patients  
56  
57 suffered from. Our findings also reflect the burden of post-COVID sequelae, providing some specific  
58  
59



1  
2  
3 insight on their impact on the extra-use of health services according to patients' characteristics and  
4  
5 vaccination status. Vaccination is associated with lower cost of care following covid infection,  
6  
7 highlighting the favourable impact of vaccines on the use of health services even when they do not  
8  
9 prevent infection, in keeping with their capacity to reduce the clinical burden associated to SARS-CoV-  
10  
11 2 infection. We plan to expand these data in a further paper using longer follow-up periods, also with  
12  
13 higher numbers of vaccinated people to allow a comparison between those who developed COVID  
14  
15 and those who do not, and to warrant the inclusion of boosted people who could not be included in  
16  
17 our cohort yet.  
18  
19  
20  
21  
22  
23  
24  
25  
26  
27  
28  
29  
30  
31  
32  
33  
34  
35  
36  
37  
38  
39  
40  
41  
42  
43  
44  
45  
46  
47  
48  
49  
50  
51  
52  
53  
54  
55  
56  
57  
58  
59  
60

### **Author contributions**

RG, GF and MM conceived the study; MM and DF extracted the data; RG and MM analysed the data; GF and RG interpreted its results and drafted the paper; GF revised the final version. All the authors revised the article critically for important intellectual content.

All authors approved the version to be published and agree to be accountable for all aspects of the work in ensuring that questions related to the accuracy or integrity of any part of the work are appropriately investigated and resolved

The lead author\* affirms that this manuscript is an honest, accurate, and transparent account of the study being reported; that no important aspects of the study have been omitted; and that any discrepancies from the study as planned (and, if relevant, registered) have been explained.

\*The manuscript's guarantor.

**Competing interests:** all authors declare that they do not have competing interests

**Participant consent:** not required (anonymised study cohort in a database, the "Area Vasta Emilia Nord" Ethics Committee waived its need)

### ***Data sharing statement***

Data will be made available upon reasonable request to the Authors and in compliance with current legislation for privacy protection. Requests should outline the objectives of the research and a protocol for the analyses in order to have the transfer of the data approved by the local Ethics Committee.

### ***Role of the funding source***

1  
2  
3 The study did not receive any external funding. It was entirely supported by the Azienda Unità Sanitaria  
4  
5 Locale-IRCCS of Reggio Emilia, Reggio Emilia (Italy).  
6  
7  
8  
9

10 **Ethics approval** : The study has been approved by the Area Vasta Emilia Nord Ethics Committee on  
11  
12 13/01/2022 n° 2022/0004443.  
13  
14  
15  
16  
17  
18  
19  
20  
21  
22  
23  
24  
25  
26  
27  
28  
29  
30  
31  
32  
33  
34  
35  
36  
37  
38  
39  
40  
41  
42  
43  
44  
45  
46  
47  
48  
49  
50  
51  
52  
53  
54  
55  
56  
57  
58  
59  
60

## References

1. Moynihan R, Sanders S, Michaleff ZA, et al. Impact of COVID-19 pandemic on utilisation of healthcare services: a systematic review. *BMJ Open* 2021;11:e045343. doi: 10.1136/bmjopen-2020-045343
2. World Health Organization. A clinical case definition of post COVID-19 condition by a Delphi consensus, 6 October 2021. [https://www.who.int/publications/i/item/WHO-2019-nCoV-Post\\_COVID-19\\_condition-Clinical\\_case\\_definition-2021.1](https://www.who.int/publications/i/item/WHO-2019-nCoV-Post_COVID-19_condition-Clinical_case_definition-2021.1)
3. National Institute for Health and Care Excellence (NICE), Scottish Intercollegiate Guidelines Network (SIGN) and Royal College of General Practitioners (RCGP). COVID-19 rapid guideline: managing the longterm effects of COVID-19. <https://www.nice.org.uk/guidance/ng188/resources/covid19-rapid-guideline-managing-the-longterm-effects-of-covid19-pdf-51035515742>
4. Groff D, Sun A, Ssentongo AE, et al. Short-term and Long-term Rates of Postacute Sequelae of SARS-CoV-2 Infection: A Systematic Review. *JAMA Netw Open*. 2021;4(10):e2128568. doi:10.1001/jamanetworkopen.2021.28568
5. Huang L, Yao Q, Gu X, Wang Q, Ren L, Wang Y, et al. 1-year outcomes in hospital survivors with COVID-19: a longitudinal cohort study. *Lancet* 2021;398:747-758
6. Davis HE, Assaf GS, McCorkell L, Wei H, Low RJ, Re'em Y, et al. Characterizing long COVID in an international cohort: 7 months of symptoms and their impact. *EClinicalMedicine* 2021;38:101019
7. Nehme M, Braillard O, Chappuis F, Courvosier DS, Guessous I, CoviCare Study Team. Prevalence of Symptoms More Than Seven Months After Diagnosis of Symptomatic COVID-19 in an Outpatient Setting. *Ann Intern Med* 2021;174:1252-1260
8. Heesakkers H, van der Hoeven JG, Corsten S, Janssen I, Ewalds E, Simons KS, Westerhof B, Rettig TCD, Jacobs C, van Santen S, Slooter AJC, van der Woude MCE, van den Boogaard M, Zegers M. Clinical Outcomes Among Patients With 1-Year Survival Following Intensive Care Unit Treatment for COVID-19. *JAMA* 2022 doi: 10.1001/jama.2022.0040
9. Giorgi Rossi P, Marino M, Formisano D, Venturelli F, Vicentini M, Grilli R; Reggio Emilia COVID-19 Working Group. Characteristics and outcomes of a cohort of COVID-19 patients in the Province of Reggio Emilia, Italy. *PLoS One*. 2020 Aug 27;15(8):e0238281. doi: 10.1371/journal.pone.0238281. PMID: 32853230; PMCID: PMC7451640.
10. Ragni P, Marino M, Formisano D, Bisaccia E, Scaltriti S, Bedeschi E, Grilli R. Association between Exposure to Influenza Vaccination and COVID-19 Diagnosis and Outcomes. *Vaccines (Basel)*. 2020 Nov 12;8(4):675
11. Charlson ME, Pompei P, Ales KL, et al. A new method of classifying prognostic comorbidity in longitudinal studies: development and validation. *J Chronic Dis* 1987;40:373–383
12. Skyrud KD, Hernæs KH, Telle KE, Magnusson K (2021) Impacts of mild COVID-19 on elevated use of primary and specialist health care services: A nationwide register study from Norway. *PLoS ONE* 16(10): e0257926. <https://doi.org/10.1371/journal.pone.0257926>

- 1  
2  
3 13. Magnusson K, Skyrud KD, Suren P, Greve-Isdahl M, Størdal K, Kristoffersen DT, Telle K.  
4 Healthcare use in 700 000 children and adolescents for six months after covid-19: before and  
5 after register based cohort study. BMJ. 2022 Jan 17;376:e066809. doi: 10.1136/bmj-2021-  
6 066809  
7  
8 14. <https://www.nytimes.com/interactive/2021/world/italy-covid-cases.html> (last accessed:  
9 November 7, 2022)  
10  
11  
12  
13  
14  
15  
16  
17  
18  
19  
20  
21  
22  
23  
24  
25  
26  
27  
28  
29  
30  
31  
32  
33  
34  
35  
36  
37  
38  
39  
40  
41  
42  
43  
44  
45  
46  
47  
48  
49  
50  
51  
52  
53  
54  
55  
56  
57  
58  
59  
60

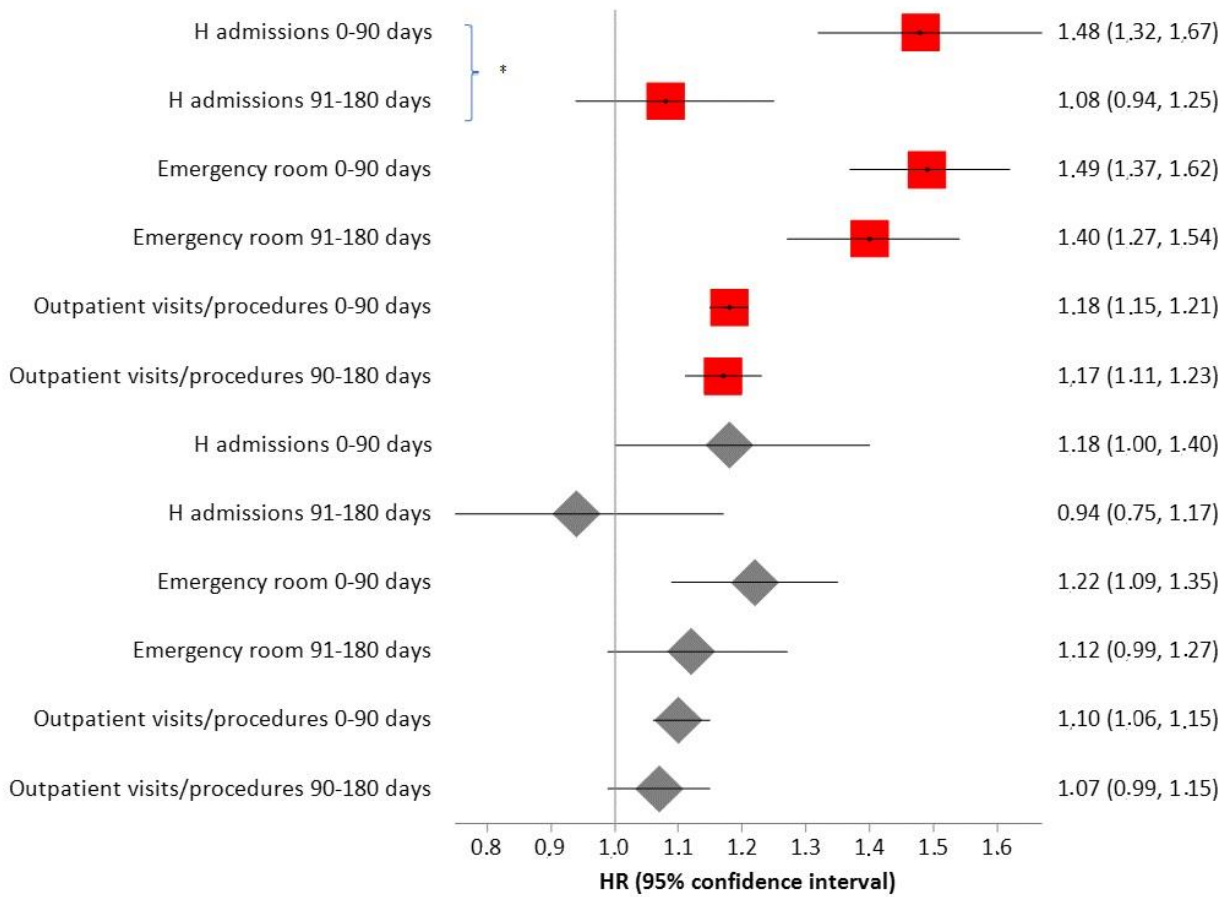

Figure 1: HRs (from Poisson regression) comparing rates of occurrence of the events considered between Covid19 convalescents and matched controls who had no swab test (red squares) and who had at least one (negative) swab test (grey diamonds). \*P<0.05

STROBE Statement—Checklist of items that should be included in reports of *cohort studies*

|                              | Item No | Recommendation                                                                                                                                                                                                                                                                                                                            |
|------------------------------|---------|-------------------------------------------------------------------------------------------------------------------------------------------------------------------------------------------------------------------------------------------------------------------------------------------------------------------------------------------|
| <b>Title and abstract</b>    | 1       | Indicate the study's design with a commonly used term in the title or the abstract<br><b>Pag. 1, 3</b>                                                                                                                                                                                                                                    |
|                              |         | Provide in the abstract an informative and balanced summary of what was done and what was found<br><b>Pag. 2,3</b>                                                                                                                                                                                                                        |
| <b>Introduction</b>          |         |                                                                                                                                                                                                                                                                                                                                           |
| Background/rationale         | 2       | Explain the scientific background and rationale for the investigation being reported<br><b>Pag. 4,5</b>                                                                                                                                                                                                                                   |
| Objectives                   | 3       | State specific objectives, including any prespecified hypotheses<br><b>Pag. 4,5</b>                                                                                                                                                                                                                                                       |
| <b>Methods</b>               |         |                                                                                                                                                                                                                                                                                                                                           |
| Study design                 | 4       | Present key elements of study design early in the paper<br><b>Pag. 5</b>                                                                                                                                                                                                                                                                  |
| Setting                      | 5       | Describe the setting, locations, and relevant dates, including periods of recruitment, exposure, follow-up, and data collection<br><b>Pag. 5,6</b>                                                                                                                                                                                        |
| Participants                 | 6       | Give the eligibility criteria, and the sources and methods of selection of participants. Describe methods of follow-up<br><b>Pag. 5,6</b>                                                                                                                                                                                                 |
|                              |         | For matched studies, give matching criteria and number of exposed and unexposed<br><b>Pag. 6</b>                                                                                                                                                                                                                                          |
| Variables                    | 7       | Clearly define all outcomes, exposures, predictors, potential confounders, and effect modifiers. Give diagnostic criteria, if applicable<br><b>Pag. 7, 8</b>                                                                                                                                                                              |
| Data sources/<br>measurement | 8*      | For each variable of interest, give sources of data and details of methods of assessment (measurement). Describe comparability of assessment methods if there is more than one group<br><b>Pag. 5 to 8</b>                                                                                                                                |
| Bias                         | 9       | Describe any efforts to address potential sources of bias<br><b>Pag. 6 to 8</b>                                                                                                                                                                                                                                                           |
| Study size                   | 10      | Explain how the study size was arrived at<br><b>No formal calculation, descriptive study. Criteria for the cohort selection and follow-up are described in pag. 5,6</b>                                                                                                                                                                   |
| Quantitative variables       | 11      | Explain how quantitative variables were handled in the analyses. If applicable, describe which groupings were chosen and why<br><b>Pag. 7,8</b>                                                                                                                                                                                           |
| Statistical methods          | 12      | (a) Describe all statistical methods, including those used to control for confounding<br>(b) Describe any methods used to examine subgroups and interactions<br>(c) Explain how missing data were addressed<br>(d) If applicable, explain how loss to follow-up was addressed<br>(e) Describe any sensitivity analyses<br><b>Pag. 7,8</b> |
| <b>Results</b>               |         |                                                                                                                                                                                                                                                                                                                                           |
| Participants                 | 13*     | Report numbers of individuals at each stage of study—eg numbers potentially eligible, examined for eligibility, confirmed eligible, included in the study,                                                                                                                                                                                |

|                          |     |                                                                                                                                                                                                                                        |
|--------------------------|-----|----------------------------------------------------------------------------------------------------------------------------------------------------------------------------------------------------------------------------------------|
|                          |     | completing follow-up, and analysed<br><b>Pag. 5,6</b>                                                                                                                                                                                  |
|                          |     | Give reasons for non-participation at each stage<br><b>Not applicable</b>                                                                                                                                                              |
|                          |     | (c) Consider use of a flow diagram                                                                                                                                                                                                     |
| Descriptive data         | 14* | Give characteristics of study participants (eg demographic, clinical, social) and information on exposures and potential confounders<br><b>Pag. 6</b>                                                                                  |
|                          |     | Indicate number of participants with missing data for each variable of interest<br><b>Not applicable</b>                                                                                                                               |
|                          |     | Summarise follow-up time (eg, average and total amount)<br><b>Pag. 8</b>                                                                                                                                                               |
| Outcome data             | 15* | Report numbers of outcome events or summary measures over time<br><b>Pag. 9 to 16</b>                                                                                                                                                  |
| Main results             | 16  | Give unadjusted estimates and, if applicable, confounder-adjusted estimates and their precision (eg, 95% confidence interval). Make clear which confounders were adjusted for and why they were included<br><b>Pag. 9 to 11, 14,15</b> |
|                          |     | Report category boundaries when continuous variables were categorized<br><b>Not applicable</b>                                                                                                                                         |
|                          |     | If relevant, consider translating estimates of relative risk into absolute risk for a meaningful time period<br><b>Pag. 17</b>                                                                                                         |
| Other analyses           | 17  | Report other analyses done—eg analyses of subgroups and interactions, and sensitivity analyses<br><b>Pag. 12 to 16</b>                                                                                                                 |
| <b>Discussion</b>        |     |                                                                                                                                                                                                                                        |
| Key results              | 18  | Summarise key results with reference to study objectives<br><b>Pag. 17,18</b>                                                                                                                                                          |
| Limitations              | 19  | Discuss limitations of the study, taking into account sources of potential bias or imprecision. Discuss both direction and magnitude of any potential bias<br><b>Pag. 19</b>                                                           |
| Interpretation           | 20  | Give a cautious overall interpretation of results considering objectives, limitations, multiplicity of analyses, results from similar studies, and other relevant evidence<br><b>Pag. 19,20</b>                                        |
| Generalisability         | 21  | Discuss the generalisability (external validity) of the study results<br><b>Pag. 19</b>                                                                                                                                                |
| <b>Other information</b> |     |                                                                                                                                                                                                                                        |
| Funding                  | 22  | Give the source of funding and the role of the funders for the present study and, if applicable, for the original study on which the present article is based<br><b>Pag. 22</b>                                                        |

\*Give information separately for exposed and unexposed groups.

**Note:** An Explanation and Elaboration article discusses each checklist item and gives methodological background and published examples of transparent reporting. The STROBE checklist is best used in conjunction with this article (freely available on the Web sites of PLoS Medicine at <http://www.plosmedicine.org/>, Annals of Internal Medicine at <http://www.annals.org/>, and Epidemiology at <http://www.epidem.com/>). Information on the STROBE Initiative is available at <http://www.strobe-statement.org>.



# BMJ Open

## Patterns of utilisation of specialist care after SARS-Cov-2 infection: a retrospective cohort study

|                                 |                                                                                                                                                                                                                                                                                                                                                                                                                                                                                                                                                     |
|---------------------------------|-----------------------------------------------------------------------------------------------------------------------------------------------------------------------------------------------------------------------------------------------------------------------------------------------------------------------------------------------------------------------------------------------------------------------------------------------------------------------------------------------------------------------------------------------------|
| Journal:                        | <i>BMJ Open</i>                                                                                                                                                                                                                                                                                                                                                                                                                                                                                                                                     |
| Manuscript ID                   | bmjopen-2022-063493.R2                                                                                                                                                                                                                                                                                                                                                                                                                                                                                                                              |
| Article Type:                   | Original research                                                                                                                                                                                                                                                                                                                                                                                                                                                                                                                                   |
| Date Submitted by the Author:   | 06-Feb-2023                                                                                                                                                                                                                                                                                                                                                                                                                                                                                                                                         |
| Complete List of Authors:       | Formoso, Giulio; Azienda Unità Sanitaria Locale - IRCCS Tecnologie Avanzate e Modelli Assistenziali in Oncologia di Reggio Emilia, Clinical Governance Unit<br>Marino, Massimiliano; Azienda Unità Sanitaria Locale - IRCCS Tecnologie Avanzate e Modelli Assistenziali in Oncologia di Reggio Emilia<br>Formisano, Debora; Azienda Unità Sanitaria Locale - IRCCS Tecnologie Avanzate e Modelli Assistenziali in Oncologia di Reggio Emilia<br>Grilli, Roberto; Local Health Agency of Romagna, Unità Ricerca Valutativa e Policy Servizi Sanitari |
| <b>Primary Subject Heading</b>: | Health services research                                                                                                                                                                                                                                                                                                                                                                                                                                                                                                                            |
| Secondary Subject Heading:      | Public health, Epidemiology                                                                                                                                                                                                                                                                                                                                                                                                                                                                                                                         |
| Keywords:                       | Organisation of health services < HEALTH SERVICES ADMINISTRATION & MANAGEMENT, Clinical governance < HEALTH SERVICES ADMINISTRATION & MANAGEMENT, COVID-19, EPIDEMIOLOGY, PUBLIC HEALTH                                                                                                                                                                                                                                                                                                                                                             |
|                                 |                                                                                                                                                                                                                                                                                                                                                                                                                                                                                                                                                     |

SCHOLARONE™  
Manuscripts



I, the Submitting Author has the right to grant and does grant on behalf of all authors of the Work (as defined in the below author licence), an exclusive licence and/or a non-exclusive licence for contributions from authors who are: i) UK Crown employees; ii) where BMJ has agreed a CC-BY licence shall apply, and/or iii) in accordance with the terms applicable for US Federal Government officers or employees acting as part of their official duties; on a worldwide, perpetual, irrevocable, royalty-free basis to BMJ Publishing Group Ltd ("BMJ") its licensees and where the relevant Journal is co-owned by BMJ to the co-owners of the Journal, to publish the Work in this journal and any other BMJ products and to exploit all rights, as set out in our [licence](#).

The Submitting Author accepts and understands that any supply made under these terms is made by BMJ to the Submitting Author unless you are acting as an employee on behalf of your employer or a postgraduate student of an affiliated institution which is paying any applicable article publishing charge ("APC") for Open Access articles. Where the Submitting Author wishes to make the Work available on an Open Access basis (and intends to pay the relevant APC), the terms of reuse of such Open Access shall be governed by a Creative Commons licence – details of these licences and which [Creative Commons](#) licence will apply to this Work are set out in our licence referred to above.

Other than as permitted in any relevant BMJ Author's Self Archiving Policies, I confirm this Work has not been accepted for publication elsewhere, is not being considered for publication elsewhere and does not duplicate material already published. I confirm all authors consent to publication of this Work and authorise the granting of this licence.

1  
2  
3 **Patterns of utilisation of specialist care after SARS-Cov-2 infection: a**  
4  
5  
6 **retrospective cohort study**  
7  
8  
9

10 **Authors:**

11  
12  
13 Giulio Formoso <sup>1\*</sup>, MPH MPharm, Massimiliano Marino PhD <sup>1</sup>, Debora Formisano PhD <sup>1</sup>, Roberto Grilli

14  
15  
16 MD <sup>1,2</sup>  
17

18  
19 **Affiliations:**

20  
21  
22  
23 <sup>1</sup> Direzione Sanitaria, Azienda Unità Sanitaria Locale – IRCCS di Reggio Emilia, Reggio Emilia, Italy

24  
25  
26 <sup>2</sup> Unità Ricerca Valutativa e Policy Servizi Sanitari, AUSL della Romagna, via De Gasperi, 8, Ravenna,

27  
28 Italy  
29

30  
31  
32 **Correspondence to:** Giulio Formoso, e-mail: [giulio.formoso@ausl.re.it](mailto:giulio.formoso@ausl.re.it)

33  
34  
35 Address: Via Amendola 2; 42122 Reggio Emilia (Italy)  
36  
37  
38  
39  
40

41 **Word count:** 3299 words  
42  
43  
44  
45  
46  
47  
48  
49  
50  
51  
52  
53  
54  
55  
56  
57  
58  
59  
60

1  
2  
3 **Abstract** (word count: 287)  
4  
5  
6  
7  
8

9 **Objective:** to explore the pattern of health services utilisation of people who had had a documented  
10 SARS-Cov-2 infection.  
11  
12

13  
14 **Design:** retrospective cohort study.  
15  
16

17 **Setting:** the Italian province of Reggio Emilia.  
18  
19

20 **Participants:** 36,036 subjects who recovered from SARS-CoV-2 infection during the period Sept 2020–  
21 May 2021. These were matched for age, sex and Charlson Index with an equal number of subjects never  
22 found positive at the SARS-Cov-2 swab test over the study period.  
23  
24  
25

26  
27 **Main outcome measures:** hospital admissions for all medical conditions and for respiratory or  
28 cardiovascular conditions only; access to emergency room (for any cause); outpatient specialist visits  
29 (pneumology, cardiology, neurology, endocrinology, gastroenterology, rheumatology, dermatology,  
30 mental health); overall cost of care.  
31  
32  
33

34  
35  
36  
37 **Results:** within a median follow-up time of 152 days (range 1-180) previous exposure to SARS-Cov-2  
38 infection was always associated with higher probability of needing access to hospital or ambulatory  
39 care, except for dermatology, mental health, and gastroenterology specialist visits. Post-COVID subjects  
40 with Charlson Index  $\geq 1$  were hospitalized more frequently for heart disease and for non-surgical  
41 reasons than subjects with Charlson index =0, whereas the opposite occurred for hospitalisations for  
42 respiratory diseases and pneumology visits. A previous SARS-CoV2 infection was associated with 27%  
43 higher cost of care compared to people never infected. The difference in cost was more evident among  
44  
45  
46  
47  
48  
49  
50  
51  
52  
53  
54  
55  
56  
57  
58  
59  
60

1  
2  
3 those with Charlson Index $\geq$ 1. Subjects who had anti-SARS-CoV2 vaccination had lower probability of  
4  
5 falling in the highest cost quartile.  
6  
7

8 **Conclusions:** our findings reflect the burden of post-COVID sequelae, providing some specific insight on  
9  
10 their impact on the extra-use of health services according to patients' characteristics and vaccination  
11  
12 status. Vaccination is associated with lower cost of care following SARS-CoV-2 infection, highlighting  
13  
14 the favourable impact of vaccines on the use of health services even when they do not prevent  
15  
16 infection.  
17  
18  
19  
20  
21  
22

### 23 **Strengths and limitations of this study**

- 24  
25  
26 • Our study provide insight on the extra-use of specific health services and related cost of care by  
27  
28 COVID patients after they have recovered, compared to people never infected by SARS-Cov-2.  
29  
30
- 31 • Subgroup and sensitivity analyses provide further insight on how demographic/clinical  
32  
33 characteristics, vaccination status, time to recovery, recent hospital and emergency room  
34  
35 admissions and subsequent admissions due to COVID are associated with use of health services.  
36  
37
- 38 • Limits in the quality of administrative data cannot be excluded, as well as the possibility of  
39  
40 residual confounding.  
41  
42
- 43 • Further studies should provide longer follow-up data, also with higher numbers of vaccinated  
44  
45 people to allow a comparison between those who developed COVID and those who do not,  
46  
47 and to warrant the inclusion of boosted people who could not be included in our cohort yet.  
48  
49  
50  
51  
52  
53  
54  
55  
56  
57  
58  
59  
60

## Introduction

The SARS-Cov-2 pandemic forced radical changes in the organization and delivery of care, requiring a rapid expansion of health services capacity in some sectors (i.e. additional hospital beds in general and intensive care units in particular), the adoption and implementation of public health measures and interventions for efficient identification of new case and contact tracing, and the reorganization of primary care services to allow COVID-19 patients to be cared for as much as possible at home. As it has been described, these changes had been at the expense of the management of other diseases, being the volume of procedures and interventions for conditions other than COVID-19 drastically reduced [1].

However, the pandemic could have also long-term implications for health care systems, generating additional health care needs in individuals who have been diagnosed with SARS-CoV-2 infection. Indeed, after infection a variable proportion of individuals experience a condition defined as “post COVID-19 syndrome”, or “long COVID-19”, with the persistence of signs and symptoms (or occurrence of new symptoms) after one to three months from the end of the acute phase [2,3]. In particular, cohort studies and systematic reviews have described the persistence of several symptoms including neurologic disorders (i.e. the so called “brain fog”, ageusia/anosmia), mental health disorders (e.g. anxiety, depression, sleep problems), functional impairment, respiratory, cardiac, digestive and skin disorders, etc. Although their incidence is widely variable across studies and depends on the background health status and on the initial COVID symptomatology, some of these symptoms (in particular, respiratory and neurologic disorders) can affect up to half to three-quarters of recovered patients [4-8].

In this study, conducted in the Italian province of Reggio Emilia (population 539,652), we assessed the additional burden (if any) to health services due to the management of those who had a documented

1  
2  
3 SARS-Cov-2 infection, exploring their pattern of specific inpatient and outpatient health services  
4  
5 utilisation after recovering from the infection.  
6  
7  
8  
9

## 10 11 **Methods**

### 12 13 14 *Study design*

15  
16  
17 We conducted a retrospective cohort study in which individuals from the resident population who  
18  
19 had a negative PCR on naso and oropharyngeal swab test for SARS-Cov-2 after having been found  
20  
21 positive at the same test, or who were asymptomatic after 21 days from the positive test, were  
22  
23 followed up over time and their rates of health services utilization assessed and compared with a  
24  
25 matched cohort of residents never found positive at the SARS-Cov-2 test.  
26  
27  
28  
29

### 30 31 *Study population and data sources*

32  
33 Since the inception of the pandemic in March 2020, a surveillance database has been implemented in  
34  
35 the province, including all the citizens undergoing SARS-Cov-2 swab test and its result, as well as time  
36  
37 of recovery. [9, 10] For this study, we identified from the SARS-Cov-2 surveillance database all those  
38  
39 who, after being diagnosed with SARS-Cov-2 infection, recovered during the period Sept 2020 – May  
40  
41 2021. These individuals (n= 36,036) represented the cohort of those who previously had a documented  
42  
43 SARS-Cov-2 infection.  
44  
45  
46  
47

48 Through record linkage procedures between the SARS-CoV-2 database and the administrative  
49  
50 databases available to the Local Health Authority, we then assessed their rates of use of health services  
51  
52 from the date of recovery indicated in the COVID database (index date) up to June 30, 2021.  
53  
54  
55  
56  
57  
58  
59  
60

1  
2  
3 The administrative databases include, for each resident in the province, demographic information,  
4  
5 hospital discharge data (coded according to the International Classification of Diseases-9-CM [ICD-9-  
6  
7 CM]) of diagnosis and procedures, admission and discharge dates, vital status at discharge, and  
8  
9 outpatient pharmacy data at the individual prescription level, as well as access to outpatient  
10  
11 ambulatory care. Data were anonymized, and record linkage procedures were performed according to  
12  
13 the unique identification number which is assigned to each resident. In addition, for each individual,  
14  
15 we searched for information on previous hospitalisations (up to preceding 10 years), as registered in  
16  
17 these local administrative databases, in order to assess the presence of specific comorbidities  
18  
19 individually (chronic obstructive pulmonary disease, arrhythmia, diabetes, acute myocardial infraction,  
20  
21 heart failure, vascular diseases, obesity), and to estimate individual patients' overall degree of  
22  
23 comorbidity (if any), according to the (not age-adjusted) Charlson Index.[11]  
24  
25  
26  
27  
28  
29

30 Relying on the same data sources, we identified individuals to be included in the control group among  
31  
32 residents alive at Jan 1<sup>st</sup> 2020 and never found positive at the SARS-Cov-2 swab test over the study  
33  
34 period (either with negative tests or with no test at all). Individuals in the control group were matched  
35  
36 according to age, sex, and Charlson Index (in four classes: 0, 1, 2 and  $\geq 3$ ). Each control had the same  
37  
38 index date of the matched SARS-Cov-2 infected individual. Therefore, the matching procedure made  
39  
40 available 36,036 persons for each cohort, with equal distribution as for sex (18,481 were female,  
41  
42 51.3%), age (mean 43, range 1-103), comorbidities (32,561 had Charlson Index 0, while 1391, 1146 and  
43  
44 938 had Charlson Index 1, 2 and  $\geq 3$ , respectively).  
45  
46  
47  
48  
49

50 People who died during the follow-up were censored at the time of death.  
51  
52

### 53 *Outcome measures*

54  
55  
56  
57  
58  
59  
60



1  
2  
3 The following items of care provided over the study period were considered, taking into account the  
4  
5 most common symptoms persisting after the acute phase of COVID-19 disease:[3]  
6  
7

- 8  
9 - hospital admissions for all medical conditions;  
10  
11 - hospital admissions for respiratory or cardiovascular conditions only;  
12  
13 - access to Emergency Room (for any cause);  
14  
15  
16 - outpatient specialist visits (pneumology, cardiology, neurology, endocrinology,  
17  
18 gastroenterology, dermatology, rheumatology, mental health).  
19  
20

21 The cost of individual procedures and services (according to official fees) and of drugs was taken as  
22  
23 overall measure of the burden to the regional health care system of the care provided to individuals in  
24  
25 both the cohorts. In cost analysis, in addition to the above reported items of care, we considered also  
26  
27 all the outpatient diagnostic procedures and tests (i.e. blood tests, chest x-ray, etc.) and drug  
28  
29 prescriptions.  
30  
31  
32  
33

### 34 *Statistical analyses*

35  
36

37 Descriptive analysis of the items of care provided to individuals in the two cohorts are reported, as well  
38  
39 as Poisson rates with 95% confidence intervals (95%CI). Rates have the total number of episodes of care  
40  
41 observed as numerator, and person-months as denominator.  
42  
43  
44

45 The strength of the association between previous SARS-Cov-2 infection and rates of use of the items of  
46  
47 care considered was assessed through Hazard Ratios (HR). In order to better disentangle the effect of  
48  
49 the previous SARS-Cov-2 infection, rather than of coexisting diseases, we stratified the analysis by  
50  
51 Charlson comorbidity index, thus estimating HRs separately for convalescent COVID-19 patients and  
52  
53 control individuals with Charlson Index =0 and with Charlson Index  $\geq 1$ . We also calculated separate  
54  
55  
56  
57  
58  
59  
60

1  
2  
3 HRs considering COVID convalescents who were hospitalized and not hospitalized (vs controls), controls  
4  
5 who either had negative test or no test at all (vs COVID convalescents), HRs according to quartiles of  
6  
7 time to recovery and HRs for outpatient visits, hospital and emergency room admissions in the first 90  
8  
9 days and after 90 days from the index date, to assess their trend over time. A sensitivity analysis  
10  
11 adjusting for imbalances in hospital and emergency room admissions in the year before the index date  
12  
13 was also performed, to limit the possible influence of recent acute health problems on the risk of  
14  
15 subsequent use of health services.  
16  
17  
18

19  
20 Mean case vs control cost differences (with 95%CI) are reported overall and according to age, sex, and  
21  
22 Charlson Index. Total cost of care was divided in quartiles and the association between the  
23  
24 characteristics of those who had SARS-Cov-2 infection and higher costs was assessed through a logistic  
25  
26 regression model, with the highest costs quartile as dependent variable, and age (in categorised in four  
27  
28 classes:  $\leq 30$ , 31-50, 51-70,  $\geq 71$ ), sex, presence of symptoms at diagnosis and hospital admission for  
29  
30 COVID-19 (both proxy indicators of COVID-19 severity), and pre-existence of specific comorbidities as  
31  
32 covariates. As 986 (3%) of those who had SARS-CoV-2 infection had also received SARS-Cov-2  
33  
34 vaccination before testing positive at the swab test, we included SARS-Cov-2 vaccination status among  
35  
36 the covariates.  
37  
38  
39  
40  
41  
42  
43  
44  
45

46 ***Patient and public involvement:*** none  
47  
48  
49  
50  
51  
52  
53  
54  
55  
56  
57  
58  
59  
60

## Results

Seventy-seven percent of people in the SARS-Cov-2 cohort recovered within 21 days from a positive test and had a negative exit test; the remaining 23% were asymptomatic (without an exit test) after 21 days. After a median follow-up of 152 days (range 1-180), 51 and 186 individuals died, in the control and the SARS-Cov-2 positive group, respectively. Among those who had been positive at the swab test, 16,286 (45%) individuals did not use hospital care and never accessed outpatient services, vs 18,055 (50%) in the control group ( $\chi^2_{1df} = 174.65$ ;  $p < 0.001$ ).

Both the proportion of individuals having at least one access at the items of care considered and the overall frequency of use was always higher in the SARS-Cov-2 positive cohort, especially for respiratory and cardiovascular hospital admissions and outpatients visits. Dermatology, mental health, and gastroenterology specialist visits have a different pattern, being the difference between the two groups negligible, if any. (Table 1)

**Table 1.** Frequency of use of hospital and ambulatory care by a cohort of 36,036 convalescent COVID-19 patients vs a matched control cohort, in the Province of Reggio Emilia (Italy).

|                                     |                     | Convalescent COVID- | Matched Control | %Differenc |
|-------------------------------------|---------------------|---------------------|-----------------|------------|
| In H for respiratory disease        | Total N admissions  | 126                 | 45              | +180%      |
| In H for heart disease              | Total N admissions  | 143                 | 76              | +88%       |
| In H for any medical reason         | At least one, N (%) | 724 (2.0)           | 538 (1.5)       |            |
|                                     | Total N admissions  | 916                 | 675             | +36%       |
| Access to Emergency Room            | At least one, N (%) | 3383 (9.4)          | 2491 (6.9)      |            |
|                                     | Total N accesses    | 4299                | 3186            | +35%       |
| Death                               |                     | 186                 | 51              | +264%      |
| <b>Outpatient specialist visits</b> |                     |                     |                 |            |
|                                     | At least one, N (%) | 766 (2.0)           | 310 (0.9)       |            |

|                  |                     |              |            |             |            |            |      |      |
|------------------|---------------------|--------------|------------|-------------|------------|------------|------|------|
| Pneumology       | Total N             | First visits | 924        | 572 (61.9)  | 380        | 154 (40.5) | +143 | +271 |
| Cardiology       | At least one, N (%) |              | 1588 (4.4) |             | 1119 (3.0) |            |      |      |
|                  | Total N             | First visits | 1708       | 1173 (68.7) | 1198       | 716 (59.7) | +43  | +64  |
| Neurology        | At least one, N (%) |              | 758 (2.1)  |             | 625 (1.7)  |            |      |      |
|                  | Total N             | First visits | 939        | 568 (60.5)  | 756        | 424 (56.1) | +24  | +34  |
| Rheumatology     | At least one, N (%) |              | 533 (1.5)  |             | 461 (1.3)  |            |      |      |
|                  | Total N             | First visits | 670        | 254 (37.9)  | 571        | 181 (31.6) | +17  | +40  |
| Gastroenterology | At least one, N (%) |              | 268 (0.7)  |             | 258 (0.7)  |            |      |      |
|                  | Total N             | First visits | 317        | 181 (57)    | 304        | 157 (51.6) | +4   | +15  |
| Endocrinology    | At least one, N (%) |              | 1397 (3.9) |             | 1116 (3.1) |            |      |      |
|                  | Total N             | First visits | 1942       | 458 (23.6)  | 1500       | 320 (21.3) | +29  | +43  |
| Dermatology      | At least one, N (%) |              | 1470 (4.1) |             | 1407 (3.9) |            |      |      |
|                  | Total N             | First visits | 1670       | 501 (30.0)  | 1574       | 481 (30.5) | +6%  | +4   |
| Mental Health    | At least one, N (%) |              | 174 (0.5)  |             | 175 (0.5)  |            |      |      |
|                  | Total N             | First visits | 190        | 117 (61.6)  | 209        | 104 (49.5) | -9%  | +12  |

Hazard ratios, overall, by Charlson Index and by COVID related hospitalization are outlined in Table 2.

**Table 2.** Rates (x1,000 x month) and hazard ratios of access to hospital care, outpatient specialist visits, and death for convalescent COVID-19 patients and the control group, overall and according to Charlson Index and hospitalization for COVID-19

|                                      |          | Rates x 1000 (95%CI) | HR (95%CI)          | HR in Charlson Index =0 (95%CI)* | HR in Charlson Index =>1 (95%CI)* | HR hospitalised COVID19 vs control (95%CI) | HR non hospitalised COVID19 vs control (95%CI) |
|--------------------------------------|----------|----------------------|---------------------|----------------------------------|-----------------------------------|--------------------------------------------|------------------------------------------------|
| Non-surgical h admissions            | control  | 3.8<br>(3.5-4.1)     | 1                   | 1                                | 1                                 | 1                                          | 1                                              |
|                                      | COVID-19 | 5.2<br>(4.9-5.5)     | 1.38<br>(1.25-1.52) | 1.11<br>(0.97-1.27)              | 1.83<br>(1.73-2.14)               | 3.16<br>(2.53-3.95)                        | 1.12<br>(1.0-1.29)                             |
| H admissions for respiratory disease | control  | 0.3<br>(0.2-0.4)     | 1                   | 1                                | 1                                 | 1                                          | 1                                              |
|                                      | COVID-19 | 0.7<br>(0.6-0.9)     | 2.09<br>(2.07-4.09) | 6.69<br>(2.84-15.7)              | 2.3<br>(1.57-3.36)                | 4.19<br>(2.41-7.30)                        | 1.91<br>(1.27-2.89)                            |
| H admissions for heart disease       | control  | 0.4<br>(0.3-0.5)     | 1                   | 1                                | 1                                 | 1                                          | 1                                              |
|                                      | COVID-19 | 0.8<br>(0.7-1.0)     | 1.93<br>(1.46-2.55) | 1.49<br>(1.37-1.62)              | 2.38<br>(1.62-3.5)                | 3.56<br>(2.02-6.25)                        | 1.44<br>(1.04-1.97)                            |
| Accesses to Emergency Room           | control  | 7.4<br>(7.1-7.7)     | 1                   | 1                                | 1                                 | 1                                          | 1                                              |
|                                      | COVID-19 | 9.5<br>(9.2-9.8)     | 1.36<br>(1.29-1.42) | 1.32<br>(1.25-1.39)              | 1.51<br>(1.36-1.66)               | 2.05<br>(1.79-2.35)                        | 1.23<br>(1.18-1.29)                            |
| Death                                | control  | 0.19<br>(0.16-0.22)  | 1                   | 1                                | 1                                 | 1                                          | 1                                              |
|                                      | COVID-19 | 0.41<br>(0.35-0.47)  | 3.69<br>(2.73-4.98) | 3.07<br>(1.73-5.47)              | 3.68<br>(2.59-5.23)               | 6.20<br>(3.50-10.10)                       | 2.87<br>(2.01-4.11)                            |
| <b>Outpatient Specialist Visits</b>  |          |                      |                     |                                  |                                   |                                            |                                                |
| Pneumology                           | control  | 2.1<br>(1.9-2.4)     | 1                   | 1                                | 1                                 | 1                                          | 1                                              |
|                                      | COVID-19 | 5.2<br>(4.9-5.6)     | 2.45<br>(2.17-2.76) | 3.35<br>(3.09-3.65)              | 1.53<br>(1.36-1.71)               | 4.44<br>(3.36-5.86)                        | 1.83<br>(1.61-2.09)                            |
| Cardiology                           | control  | 6.8<br>(6.4-7.2)     | 1                   | 1                                | 1                                 | 1                                          | 1                                              |
|                                      | COVID-19 | 9.7<br>(9.2-10.2)    | 1.44<br>(1.33-1.55) | 1.53<br>(1.36-1.71)              | 1.23<br>(1.07-1.41)               | 1.72<br>(1.43-2.06)                        | 1.28<br>(1.18-1.39)                            |
| Neurology                            | control  | 4.8<br>(4.5-5.2)     | 1                   | 1                                | 1                                 | 1                                          | 1                                              |

|                  |                 |                     |                     |                       |                      |                     |                     |
|------------------|-----------------|---------------------|---------------------|-----------------------|----------------------|---------------------|---------------------|
|                  | <b>COVID-19</b> | 6.0<br>(5.7-6.4)    | 1,25<br>(1.14-1.36) | 1.22<br>(1.1-1.35)    | 1.37<br>(1.12-1.68)  | 1.46<br>(1.10-1.92) | 1.17<br>(1.06-1.28) |
| Rheumatology     | <b>control</b>  | 3.2<br>(3.0-3.5)    | 1                   | 1                     | 1                    | 1                   | 1                   |
|                  | <b>COVID-19</b> | 3.8<br>(3.5-4.1)    | 1,17<br>(1.05-1.31) | 1.19<br>(1.04 – 1.36) | 1.15<br>(0.93- 1.42) | 1.09<br>(0.78-1.51) | 1.23<br>(1.09-1.38) |
| Gastroenterology | <b>control</b>  | 1.7<br>(1.5-1.9)    | 1                   | 1                     | 1                    | 1                   | 1                   |
|                  | <b>COVID-19</b> | 1.8<br>(1.6-2.0)    | 1,04<br>(0.89-1.22) | 1.0<br>(0.84-1.20)    | 1.21<br>(0.85 -1.73) | 1.25<br>(0.68-2.32) | 0.97<br>(0.82-1.14) |
| Mental health    | <b>control</b>  | 1.2<br>(1.0-1.4)    | 1                   | 1                     | 1                    | 1                   | 1                   |
|                  | <b>COVID-19</b> | 1.1<br>(0.9-1.2)    | 0,91<br>(0.75-1.10) | 0.90<br>(0.73-1.11)   | 0.97<br>(0.54-1.74)  | 1.38<br>(0.59-3.24) | 0.93<br>(0.76-1.14) |
| Dermatology      | <b>control</b>  | 8.9<br>(8.5-9.4)    | 1                   | 1                     | 1                    | 1                   | 1                   |
|                  | <b>COVID-19</b> | 9.5<br>(9.0-9.9)    | 1,06<br>(0.99-1.14) | 1.06<br>(0.98 – 1.14) | 1.10<br>(0.92-1.31)  | 0.95<br>(0.72-1.26) | 1.07<br>(1.00-1.15) |
| Endocrinology    | <b>control</b>  | 8.5<br>(8.0-8.9)    | 1                   | 1                     | 1                    | 1                   | 1                   |
|                  | <b>COVID-19</b> | 11.0<br>(10.5-11.5) | 1,30<br>(1.21-1.39) | 1.28<br>(1.18 -1.40)  | 1.34<br>(1.19 -1.50) | 2.05<br>(1.74-2.41) | 1.11<br>(1.03-1.20) |

1  
2  
3 As shown, previous exposure to SARS-Cov-2 infection was always associated with a higher probability  
4 of needing access to hospital care which was more evident among those with Charlson Index  $\geq 1$ . The  
5  
6 only exception were hospitalizations for respiratory diseases, whose HR associated with previous SARS-  
7  
8 Cov-2 infection was higher among individuals without relevant comorbidities (HR:6.69 – 95%CI 2.84 –  
9  
10 15.70 vs HR: 2.30 – 95% 1.57 – 3.36 for those with Charlson Index  $\geq 1$ ), and access to Emergency Room,  
11  
12 whose HRs of the two subgroups were overlapping.  
13  
14  
15  
16  
17

18 The same pattern held true for outpatient services, for whom previous exposure to SARS-Cov2 infection  
19  
20 was always associated with higher probability of use but for gastrointestinal and mental health  
21  
22 specialist visits.  
23  
24  
25

26 Subsequent use of these services was higher for people who had been hospitalized for COVID-19,  
27  
28 except for rheumatology and dermatology visits (higher risk of subsequent visits for people not  
29  
30 hospitalized for COVID-19).  
31  
32  
33

34 Risk of hospital and emergency room accesses and outpatient visits were highest for SARS-CoV-2  
35  
36 positive subjects compared to controls who did not have swab tests (Figure 1). Looking more closely to  
37  
38 each specific outcome, this specific pattern was significantly shown only for accesses to emergency  
39  
40 room and for pneumology and gastroenterology visits (Table 3). A decline in HRs after 90 days from the  
41  
42 index date was observed, although this decline was statistically significant only for hospital admissions  
43  
44 when SARS-CoV-2 positive subjects were compared to controls who did not have swab tests (Figure 1).  
45  
46  
47  
48  
49  
50  
51  
52  
53  
54  
55  
56  
57  
58  
59  
60  
Subjects with higher Charlson index were more likely to have been tested. At the same time younger  
people were more likely to have been tested (Table 4).

**Table 3.** HRs (from Poisson regression) comparing rates of occurrence of the events considered between COVID19 convalescents and matched controls who had no swab test (N= 22,820) and who had at least one (negative) swab test (N=13,216).

|                                             | COVID19 convalescents vs Controls who never had swab test |           | COVID19 convalescents vs Controls who had (negative) swab test |           |
|---------------------------------------------|-----------------------------------------------------------|-----------|----------------------------------------------------------------|-----------|
|                                             | HR                                                        | 95%CI     | HR                                                             | 95%CI     |
| <b>Non surgical h admissions</b>            |                                                           |           |                                                                |           |
| • control                                   | 1                                                         |           | 1                                                              |           |
| • COVID19 convalescents                     | 1.46                                                      | 1.30-1.64 | 1.21                                                           | 1.06-1.40 |
| <b>H admissions for respiratory disease</b> |                                                           |           |                                                                |           |
| • control                                   | 1                                                         |           | 1                                                              |           |
| • COVID19 convalescents                     | 2.66                                                      | 1.82-3.89 | 2.15                                                           | 1.31-3.53 |
| <b>H admissions for heart disease</b>       |                                                           |           |                                                                |           |
| • control                                   | 1                                                         |           | 1                                                              |           |
| • COVID19 convalescents                     | 1.76                                                      | 1.30-2.39 | 1.78                                                           | 1.15-2.75 |
| <b>Accesses to Emergency Room</b>           |                                                           |           |                                                                |           |
| • control                                   | 1                                                         |           | 1                                                              |           |
| • COVID19 convalescents                     | 1.39                                                      | 1.32-1.47 | 1.14                                                           | 1.06-1.21 |
| <b>OUTPATIENT SPECIALIST VISITS</b>         |                                                           |           |                                                                |           |
| <b>Pneumology</b>                           |                                                           |           |                                                                |           |
| • control                                   | 1                                                         |           | 1                                                              |           |
| • COVID19 convalescents                     | 2.50                                                      | 2.17-2.88 | 1.71                                                           | 1.45-2.02 |
| <b>Cardiology</b>                           |                                                           |           |                                                                |           |
| • control                                   | 1                                                         |           | 1                                                              |           |
| • COVID19 convalescents                     | 1.32                                                      | 1.21-1.43 | 1.33                                                           | 1.19-1.49 |
| <b>Neurology</b>                            |                                                           |           |                                                                |           |
| • control                                   | 1                                                         |           | 1                                                              |           |
| • COVID19 convalescents                     | 1.22                                                      | 1.10-1.35 | 1.09                                                           | 0.96-1.24 |
| <b>Rheumatology</b>                         |                                                           |           |                                                                |           |
| • control                                   | 1                                                         |           | 1                                                              |           |
| • COVID19 convalescents                     | 1.16                                                      | 1.03-1.32 | 1.25                                                           | 1.05-1.47 |
| <b>Gastroenterology</b>                     |                                                           |           |                                                                |           |
| • control                                   | 1                                                         |           | 1                                                              |           |
| • COVID19 convalescents                     | 0.83                                                      | 0.70-0.99 | 1.39                                                           | 1.08-1.78 |
| <b>Mental health</b>                        |                                                           |           |                                                                |           |
| • control                                   | 1                                                         |           | 1                                                              |           |
| • COVID19 convalescents                     | 0.88                                                      | 0.71-1.10 | 1.01                                                           | 0.77-1.33 |
| <b>Dermatology</b>                          |                                                           |           |                                                                |           |
| • control                                   | 1                                                         |           | 1                                                              |           |
| • COVID19 convalescents                     | 1.04                                                      | 0.96-1.12 | 1.09                                                           | 0.99-1.21 |
| <b>Endocrinology</b>                        |                                                           |           |                                                                |           |
| • control                                   | 1                                                         |           | 1                                                              |           |
| • COVID19 convalescents                     | 1.19                                                      | 1.11-1.29 | 1.18                                                           | 1.07-1.30 |



**Table 4.** Odds ratios of being tested for SARS-CoV-2 infection within the control cohort (logistic model)

| <u>Covariates</u> | <u>Odds Ratio</u> | <u>(95% Conf. Int.)</u> |
|-------------------|-------------------|-------------------------|
| Age <30           | 1                 |                         |
| 31-50             | 0.61              | (0.58 to 0.64)          |
| 51-70             | 0.43              | (0.40 to 0.45)          |
| >71               | 0.36              | (0.33 to 0.40)          |
| Charlson Index 0  | 1                 |                         |
| 1                 | 1.32              | (1.17 to 1.49)          |
| 2                 | 1.22              | (1.07 to 1.39)          |
| 3                 | 1.37              | (1.17 to 1.59)          |
| Sex female        | 1                 |                         |
| male              | 0.93              | (0.89 to 0.97)          |

We checked patterns of access to health services in the year before the index date as well, to verify the comparability of the two cohorts in terms of health-seeking behavior. Compared to control patients, COVID convalescent patients had had more emergency room accesses (24% vs 14%), non-surgical hospital admissions (9% vs 3%) and admissions for respiratory problems (included in the former: 5% vs 0.2%) in the 365 days before the index date. This was somehow expected, considering that respiratory patients may be at higher risk of getting covid [12]. Results of a sensitivity analysis adjusting for age, sex, and occurrence of hospital admissions and/or accesses to emergency room over the 365 days before the index date are presented in Table 5, where results are also stratified for time to recovery. The risk of hospital admissions for respiratory disease and heart disease, accesses to emergency room, pneumology, cardiology, rheumatology and endocrinology visits and the risk of death remained higher for COVID convalescent patients than controls, in particular for those with longer time to recovery,

except for endocrinology visits (in the latter case, the higher risk does not seem to be related to time to recovery).

**Table 5.** Hazards ratios (HR) representing the risk of death and of requiring hospital care and outpatients specialist visits for COVID-19 convalescent patients vs controls, adjusting for age, sex, and occurrence of hospital admissions and/or accesses to emergency room over the 365 days before the index date. HRs are reported also according to time to swab test negativity (or otherwise certified end of disease).

|                                             | HR (overall)     | HR (according to time to recovery) |                          |                         |                       |
|---------------------------------------------|------------------|------------------------------------|--------------------------|-------------------------|-----------------------|
|                                             |                  | 1-14 days<br>(n=10,469)            | 15-19 days<br>(n=10,022) | 20-21 days<br>(n=7,235) | >21 days<br>(n=8,310) |
| <i>Non surgical h admissions</i>            | 1.04 (0.94-1.15) | 0.93 (0.78-1.10)                   | 0.85 (0.72-1.01)         | 0.88 (0.74-1.06)        | 1.06 (0.92-1.21)      |
| <i>H admissions for respiratory disease</i> | 1.42 (1.02-2.00) | 1.41 (0.78-2.53)                   | 0.74 (0.37-1.48)         | 0.94 (0.51-1.76)        | 1.98 (1.32-2.95)      |
| <i>H admissions for heart disease</i>       | 1.43 (1.07-1.88) | 1.43 (0.92-2.25)                   | 1.11 (0.69-1.78)         | 1.45 (0.93-2.28)        | 1.62 (1.13-2.33)      |
| <i>Accesses to Emergency Room</i>           | 1.13 (1.08-1.19) | 1.05 (0.98-1.13)                   | 1.16 (1.08-1.24)         | 1.12 (1.03-1.21)        | 1.27 (1.19-1.36)      |
| <i>Death</i>                                | 2.50 (1.83-3.42) | 1.45 (0.81-2.58)                   | 0.88 (0.45-1.69)         | 2.03 (1.25-3.30)        | 3.89 (2.73-5.55)      |
| <b>Outpatient specialist visits</b>         |                  |                                    |                          |                         |                       |
| <i>Pneumology</i>                           | 1.79 (1.59-2.01) | 1.44 (1.20-1.73)                   | 1.77 (1.49-2.10)         | 1.58 (1.30-1.93)        | 2.90 (2.49-3.37)      |
| <i>Cardiology</i>                           | 1.19 (1.11-1.29) | 1.22 (1.09-1.37)                   | 1.23 (1.08-1.39)         | 1.18 (1.03-1.34)        | 1.39 (1.25-1.54)      |
| <i>Neurology</i>                            | 1.07 (0.97-1.17) | 1.00 (0.87-1.15)                   | 1.04 (0.90-1.19)         | 1.14 (0.98-1.33)        | 1.23 (1.09-1.41)      |
| <i>Reumathology</i>                         | 1.16 (1.03-1.30) | 1.09 (0.92-1.30)                   | 1.11 (0.93-1.31)         | 1.09 (0.90-1.33)        | 1.16 (1.00-1.38)      |
| <i>Gastroenterology</i>                     | 0.88 (0.76-1.04) | 0.75 (0.58-0.98)                   | 0.96 (0.75-1.22)         | 1.06 (0.82-1.38)        | 0.97 (0.76-1.25)      |
| <i>Mental health</i>                        | 0.87 (0.72-1.07) | 0.77 (0.57-1.04)                   | 0.86 (0.63-1.16)         | 0.86 (0.61-1.21)        | 0.81 (0.58-1.14)      |
| <i>Dermatology</i>                          | 1.06 (0.99-1.13) | 1.04 (0.94-1.16)                   | 1.07 (0.97-1.19)         | 1.07 (0.95-1.21)        | 1.01 (0.90-1.13)      |
| <i>Endocrinology</i>                        | 1.09 (1.02-1.17) | 1.11 (1.00-1.24)                   | 1.17 (1.05-1.29)         | 1.07 (0.95-1.21)        | 1.12 (1.01-1.23)      |

## Costs

Overall, the cost of care provided to those who had a previous SARS-CoV2 infection was 27% higher (10,357,221 Euro, mean: 287.41, range 0 – 114,610, vs 8,149,196, mean 226.14, range 0 – 69,143). The difference in cost between the two groups was more evident (+45%) among those with relevant comorbidities (i.e. Charlson Index $\geq$ 1) than among those with Charlson Index=0 (+17%) (Table 6).

**Table 6.** Cost of care (in Euro) for convalescent COVID-19 convalescents and control cohort

|                                          | Convalescent COVID-19 |        |        |             | Control cohort |        |        |            |
|------------------------------------------|-----------------------|--------|--------|-------------|----------------|--------|--------|------------|
|                                          | Total                 | Mean   | Median | Range       | Total          | Mean   | Median | Range      |
| <b>Overall</b>                           | 10,357,221            | 287.41 | 23.0   | 0 – 114,610 | 8,149,196      | 226.14 | 14.0   | 0 – 69,143 |
| <b>Charlson Index 0</b>                  | 6,318,301             | 194.0  | 18.0   | 0 – 114,610 | 5,380,207      | 165.23 | 4.0    | 0 – 45,510 |
| <b>Charlson Index <math>\geq</math>1</b> | 4,038,919             | 1162.3 | 159.0  | 0 – 74,440  | 2,768,989      | 796.83 | 137.0  | 0 – 69,143 |

Among those in the highest quartile of total costs (i.e.  $\geq$ 114,610 Euro), 9,670 (54%) had previous SARS-CoV2 infection. The relationship between their individual characteristics and the likelihood of being in the highest quartile of costs is outlined in Table 7, according to the logistic regression model employed. Factors representing degree of severity of SARS-CoV2 infection were associated with higher cost of care in the following months, in particular aging and degree of comorbidity. As for COVID related factors, subjects with hospital admission for COVID19 and presence of symptoms at diagnosis had 66% and 32% higher probability of higher cost of care. On the contrary, those who had anti-SARS-CoV2 vaccination had 64% lower probability of falling in the highest costs quartile.

**Table 7.** Characteristics of individuals who had SARS-CoV-2 infection associated with higher costs of care in the following months

| Covariates                         |                | Odds Ratio | 95% CI         |
|------------------------------------|----------------|------------|----------------|
| Sex                                | Female         | 1          |                |
|                                    | Male           | 0.67       | (0.63 to 0.71) |
| Age                                | ≤ 30           | 1          |                |
|                                    | 31-50          | 2.17       | (2.01 to 2.34) |
|                                    | 51-70          | 3.71       | (3.44 to 4.00) |
|                                    | ≥ 71           | 4.75       | (4.32 to 5.23) |
|                                    | Charlson Index | 0          | 1              |
|                                    | 1              | 2.09       | (1.86 to 2.36) |
|                                    | 2              | 2.96       | (2.60 to 3.39) |
|                                    | ≥3             | 4.00       | (3.42 to 4.78) |
| Had anti-SARS-CoV2 vaccine         | No             | 1          |                |
|                                    | Yes            | 0.36       | (0.30 to 0.43) |
| Had Symptomatic infection          | No             | 1          |                |
|                                    | Yes            | 1.32       | (1.23 to 1.41) |
| Had hospital admission for COVID19 | No             | 1          |                |
|                                    | Yes            | 1.66       | (1.50 to 1.83) |

## Discussion

This study provides data to investigate the possible impact of SARS-Cov-2 infection on use of specific specialist care (hospital admissions and outpatient specialist visits) and on related extra costs within 6

1  
2  
3 months from recovery on a large cohort from an Italian province. Unfortunately, we could not include  
4  
5 data on primary care encounters since in Italy they are not traceable.  
6  
7

8  
9 Our data show that in the six months after recovery, out of 1,000 individuals, a previous SARS-CoV-2  
10  
11 infection was associated with 139 additional accesses in emergency room, eight additional non-  
12  
13 surgical hospital admission and two hospitalizations for respiratory disease and for heart disease. As  
14  
15 for outpatient visits, there were 19 additional pneumology visits as well as 17 cardiology, 15  
16  
17 endocrinology, seven neurology and four more rheumatology visits. This is highly consistent with the  
18  
19 higher incidence of related symptoms in post-COVID patients described in several studies. On the  
20  
21 contrary, no increase was shown in rates of mental health, gastroenterology and dermatology visits,  
22  
23 despite related symptoms have been frequently reported among long-COVID patterns. The latter  
24  
25 findings may be unexpected, especially regarding mental health services, although also studies carried  
26  
27 out in Norway did not find a higher use of these services in the post-COVID period. [13,14] Further  
28  
29 qualitative analyses are warranted to explore possible determinants of the observed pattern, also  
30  
31 considering accessibility to services.  
32  
33  
34  
35  
36  
37

38 The sensitivity analysis performed adjusting also for the occurrence of hospital admissions and/or  
39  
40 accesses to emergency room over the 365 days before the index date provided lower HRs but  
41  
42 confirmed the statistical significance of these results (except for subsequent non-surgical admissions  
43  
44 and neurological visits), mostly led by COVID convalescents who had longer time to recovery.  
45  
46  
47

48 Subgroup analyses indicate that increase in rates of non-surgical hospital admissions, hospitalizations  
49  
50 for heart disease and accesses to emergency room is more pronounced in people with comorbidities  
51  
52 (Charlson Index  $\geq 1$ ), whereas an opposite pattern is observed for rate of hospitalizations for  
53  
54 respiratory disease. This counterintuitive finding may be due to the fact that such admissions are  
55  
56  
57  
58  
59  
60

1  
2  
3 rarer in people without comorbidities, so that their relative increase in post-COVID patients is more  
4  
5 evident compared with people that, among their comorbidities, may have a higher background rate of  
6  
7 respiratory problems. The same reason may hold for the less pronounced increase in rates of  
8  
9 pneumology and cardiology outpatient visits among post-COVID patients with comorbidities. Further  
10  
11 studies may help clarify these points.  
12  
13  
14

15  
16 As expected, subsequent use of health services was higher for people who had been hospitalized for  
17  
18 COVID-19, except for rheumatology and dermatology visits (higher risk of subsequent visits for people  
19  
20 not hospitalized for COVID). The latter findings are unexpected and difficult to explain, although their  
21  
22 relevance may be limited since the corresponding confidence intervals related to hospitalized and non-  
23  
24 hospitalized patients are widely overlapping.  
25  
26

27  
28 Hazard Ratios of emergency room accesses, pneumology and gastroenterology visits comparing  
29  
30 COVID convalescents to controls who had never tested were significantly higher than HRs vs controls  
31  
32 with at least one negative test. The latter may be more likely to be tested for having higher health  
33  
34 risks (this would explain why the corresponding HRs are lower). This hypothesis is also supported by a  
35  
36 logistic model using the subjects in the control cohort: those with higher Charlson Index are more  
37  
38 likely to have been tested. At the same time younger people are more likely to have been tested (they  
39  
40 are more likely to be socially involved), while older people are less (they are more likely to have been  
41  
42 kept isolated in those months). For SARS-CoV-2 infected subjects, risk of outpatient visits and of  
43  
44 hospital or emergency room accesses was (or tended to be) lower after 90 days from the negative  
45  
46 test. Overall, in six months in our province there have been extra costs for more than 2.2 million euros  
47  
48 (about 4 euros per capita) associated with post-COVID sequelae.  
49  
50  
51  
52  
53  
54  
55  
56  
57  
58  
59  
60

1  
2  
3 Factors representing degree of severity of SARS-CoV2 infection (presence of symptoms at diagnosis,  
4 hospital admission for COVID19) were all associated with higher cost of care in the following months,  
5  
6 as well as age and degree of comorbidity. On the contrary, those who had anti-SARS-CoV2 vaccination  
7  
8 were associated with lower cost of care.  
9  
10

11  
12  
13 Our hypothesis is that COVID19 brought the positives to a subsequent greater use of services, but we  
14 cannot assume (only through various adjustments and stratifications) that they were comparable in  
15  
16 this regard also before: those who do not have a positive test may be more careful in lifestyles (and  
17  
18 more likely to be able to avoid SARS-CoV-2 infection, as well as be more likely to be visited) or vice  
19  
20 versa avoid tampons and visits. Residual confounding cannot be excluded.  
21  
22  
23

24  
25  
26 We acknowledge potential risks of misclassification, although the risk of having “non-recovered”  
27  
28 positives in the COVID database is extremely low: three-quarters of former SARS-CoV-2 infected  
29  
30 subjects had a negative exit test within 21 days from a positive test, and one quarter of them were  
31  
32 asymptomatic (after 21 days from a positive test). As for the latter, a surveillance system with daily  
33  
34 phone calls and interviews with all cases cared for in outpatient settings was into place. In addition,  
35  
36 we did not use a time window but started the follow-up from the date of recovery. The assumption is  
37  
38 that those who have been confirmed as recovered cannot be in an acute phase. This may bring a risk  
39  
40 of misclassification too, although we consider it very small and not higher than the risk of missing  
41  
42 cases which could occur within a time window.  
43  
44  
45  
46  
47  
48

49 Our observational data have been collected as part of patients’ care: reimbursements to health  
50  
51 services depend on completeness of these data, which can be assumed, and which should exclude the  
52  
53 possibility of major biases. However, limits in the quality of administrative data cannot be excluded.,  
54  
55  
56 The adjustment for imbalances in hospital and emergency room admissions in the year before the  
57  
58  
59  
60

1  
2  
3 index date, performed as sensitivity analysis and stratification for Charlson Index to better disentangle  
4  
5 the effect of the previous SARS-Cov-2 infection, rather than of coexisting diseases may limit, but of  
6  
7 course not eliminate, the possibility of residual confounding. No scientific validation of the databases  
8  
9 used and of the record-linkage procedures is available, although the unique patient identification  
10  
11 number present in all the databases should ensure that no data is lost. As for generalizability,  
12  
13 incidence of SARS-CoV-2 infection in our province since the start of the pandemic is similar to that in  
14  
15 other areas of Northern Italy, although higher than the mean Italian incidence (about 5,000 cases  
16  
17 more out of 100,000 inhabitants) [15].  
18  
19  
20  
21  
22

23 In conclusion, many studies reported the frequency of post-COVID symptoms that recovered patients  
24  
25 suffered from. Our findings also suggest an extra burden for patients and health services due to post-  
26  
27 COVID sequelae, providing some specific insight on association of SARS-CoV-2 infection with extra-use  
28  
29 of health services after the acute phase, according to patients' characteristics and vaccination status.  
30  
31 Vaccination is associated with lower cost of care following SARS-CoV-2 infection, highlighting the  
32  
33 possibly favourable impact of vaccines on the use of health services even when they do not prevent  
34  
35 infection, in keeping with their capacity to reduce the clinical burden associated to SARS-CoV-2  
36  
37 infection. We plan to expand these data in a further paper using longer follow-up periods, also with  
38  
39 higher numbers of vaccinated people to allow a comparison between those who developed COVID  
40  
41 and those who do not, and to warrant the inclusion of boosted people who could not be included in  
42  
43 our cohort yet.  
44  
45  
46  
47  
48  
49  
50  
51  
52  
53  
54  
55  
56  
57  
58  
59  
60



### **Author contributions**

RG, GF and MM conceived the study; MM and DF extracted the data; RG and MM analysed the data; GF and RG interpreted its results and drafted the paper; GF revised the final version. All the authors revised the article critically for important intellectual content.

All authors approved the version to be published and agree to be accountable for all aspects of the work in ensuring that questions related to the accuracy or integrity of any part of the work are appropriately investigated and resolved

The lead author\* affirms that this manuscript is an honest, accurate, and transparent account of the study being reported; that no important aspects of the study have been omitted; and that any discrepancies from the study as planned (and, if relevant, registered) have been explained.

\*The manuscript's guarantor.

**Competing interests:** all authors declare that they do not have competing interests

**Participant consent:** not required (anonymised study cohort in a database, the "Area Vasta Emilia Nord" Ethics Committee waived its need)

### ***Data sharing statement***

Data will be made available on request to researchers who meet the criteria for access to confidential data. Requests should outline the objectives of the research and a protocol for the analyses. In order to obtain data, approval must be obtained from the Area Vasta Emilia Nord (AVEN) Ethics Committee, who would then authorize us to provide aggregated or anonymized data. Data access requests should

1  
2  
3 be addressed to the Ethics Committee at CEReggioemilia@ausl.re.it as well as to the corresponding  
4  
5 author.  
6

7  
8 ***Role of the funding source***  
9

10  
11 The study did not receive any external funding.  
12  
13

14  
15  
16 ***Ethics approval*** : The study has been approved by the Area Vasta Emilia Nord Ethics Committee on  
17 13/01/2022 n° 2022/0004443.  
18  
19  
20  
21  
22  
23  
24  
25  
26  
27  
28  
29  
30  
31  
32  
33  
34  
35  
36  
37  
38  
39  
40  
41  
42  
43  
44  
45  
46  
47  
48  
49  
50  
51  
52  
53  
54  
55  
56  
57  
58  
59  
60

## References

1. Moynihan R, Sanders S, Michaleff ZA, et al. Impact of COVID-19 pandemic on utilisation of healthcare services: a systematic review. *BMJ Open* 2021;11:e045343. doi: 10.1136/bmjopen-2020-045343
2. World Health Organization. A clinical case definition of post COVID-19 condition by a Delphi consensus, 6 October 2021. [https://www.who.int/publications/i/item/WHO-2019-nCoV-Post\\_COVID-19\\_condition-Clinical\\_case\\_definition-2021.1](https://www.who.int/publications/i/item/WHO-2019-nCoV-Post_COVID-19_condition-Clinical_case_definition-2021.1)
3. National Institute for Health and Care Excellence (NICE), Scottish Intercollegiate Guidelines Network (SIGN) and Royal College of General Practitioners (RCGP). COVID-19 rapid guideline: managing the long-term effects of COVID-19. <https://www.nice.org.uk/guidance/ng188/resources/covid19-rapid-guideline-managing-the-longterm-effects-of-covid19-pdf-51035515742>
4. Groff D, Sun A, Ssentongo AE, et al. Short-term and Long-term Rates of Postacute Sequelae of SARS-CoV-2 Infection: A Systematic Review. *JAMA Netw Open*. 2021;4(10):e2128568. doi:10.1001/jamanetworkopen.2021.28568
5. Huang L, Yao Q, Gu X, Wang Q, Ren L, Wang Y, et al. 1-year outcomes in hospital survivors with COVID-19: a longitudinal cohort study. *Lancet* 2021;398:747-758
6. Davis HE, Assaf GS, McCorkell L, Wei H, Low RJ, Re'em Y, et al. Characterizing long COVID in an international cohort: 7 months of symptoms and their impact. *EClinicalMedicine* 2021;38:101019
7. Nehme M, Braillard O, Chappuis F, Courvosier DS, Guessous I, CoviCare Study Team. Prevalence of Symptoms More Than Seven Months After Diagnosis of Symptomatic COVID-19 in an Outpatient Setting. *Ann Intern Med* 2021;174:1252-1260
8. Heesakkers H, van der Hoeven JG, Corsten S, Janssen I, Ewalds E, Simons KS, Westerhof B, Rettig TCD, Jacobs C, van Santen S, Slooter AJC, van der Woude MCE, van den Boogaard M, Zegers M. Clinical Outcomes Among Patients With 1-Year Survival Following Intensive Care Unit Treatment for COVID-19. *JAMA* 2022 doi: 10.1001/jama.2022.0040
9. Giorgi Rossi P, Marino M, Formisano D, Venturelli F, Vicentini M, Grilli R; Reggio Emilia COVID-19 Working Group. Characteristics and outcomes of a cohort of COVID-19 patients in the Province of Reggio Emilia, Italy. *PLoS One*. 2020 Aug 27;15(8):e0238281. doi: 10.1371/journal.pone.0238281. PMID: 32853230; PMCID: PMC7451640.
10. Ragni P, Marino M, Formisano D, Bisaccia E, Scaltriti S, Bedeschi E, Grilli R. Association between Exposure to Influenza Vaccination and COVID-19 Diagnosis and Outcomes. *Vaccines (Basel)*. 2020 Nov 12;8(4):675
11. Charlson ME, Pompei P, Ales KL, et al. A new method of classifying prognostic comorbidity in longitudinal studies: development and validation. *J Chronic Dis* 1987;40:373-383
12. Johansen MD, Mahbub RM, Idrees S, Nguyen DH, Miemczyk S, Pathinayake P, et al. Increased SARS-CoV-2 infection, protease, and inflammatory responses in chronic obstructive pulmonary

- 1  
2  
3 disease primary bronchial epithelial cells defined with single-cell RNA sequencing. *Am J Respir*  
4 *Crit Care Med* 2022;206:711–728.
- 5  
6 13. Skyrud KD, Hernæs KH, Telle KE, Magnusson K (2021) Impacts of mild COVID-19 on elevated  
7 use of primary and specialist health care services: A nationwide register study from Norway.  
8 *PLoS ONE* 16(10): e0257926. <https://doi.org/10.1371/journal.pone.0257926>
- 9  
10 14. Magnusson K, Skyrud KD, Suren P, Greve-Isdahl M, Størdal K, Kristoffersen DT, Telle K.  
11 Healthcare use in 700 000 children and adolescents for six months after covid-19: before and  
12 after register based cohort study. *BMJ*. 2022 Jan 17;376:e066809. doi: 10.1136/bmj-2021-  
13 066809
- 14 15. <https://www.nytimes.com/interactive/2021/world/italy-covid-cases.html> (last accessed:  
15 November 7, 2022)
- 16  
17  
18  
19  
20  
21  
22  
23  
24  
25  
26  
27  
28  
29  
30  
31  
32  
33  
34  
35  
36  
37  
38  
39  
40  
41  
42  
43  
44  
45  
46  
47  
48  
49  
50  
51  
52  
53  
54  
55  
56  
57  
58  
59  
60



Figure 1: HRs (from Poisson regression) comparing rates of occurrence of the events considered between Covid19 convalescents and matched controls who had no swab test (red squares) and who had at least one (negative) swab test (grey diamonds). \*P<0.05

STROBE Statement—Checklist of items that should be included in reports of *cohort studies*

|                              | Item No | Recommendation                                                                                                                                                                                                                                                                                                                            |
|------------------------------|---------|-------------------------------------------------------------------------------------------------------------------------------------------------------------------------------------------------------------------------------------------------------------------------------------------------------------------------------------------|
| <b>Title and abstract</b>    | 1       | Indicate the study's design with a commonly used term in the title or the abstract<br><b>Pag. 1 to 3</b>                                                                                                                                                                                                                                  |
|                              |         | Provide in the abstract an informative and balanced summary of what was done and what was found<br><b>Pag. 2,3</b>                                                                                                                                                                                                                        |
| <b>Introduction</b>          |         |                                                                                                                                                                                                                                                                                                                                           |
| Background/rationale         | 2       | Explain the scientific background and rationale for the investigation being reported<br><b>Pag. 4,5</b>                                                                                                                                                                                                                                   |
| Objectives                   | 3       | State specific objectives, including any prespecified hypotheses<br><b>Pag. 4,5</b>                                                                                                                                                                                                                                                       |
| <b>Methods</b>               |         |                                                                                                                                                                                                                                                                                                                                           |
| Study design                 | 4       | Present key elements of study design early in the paper<br><b>Pag. 5</b>                                                                                                                                                                                                                                                                  |
| Setting                      | 5       | Describe the setting, locations, and relevant dates, including periods of recruitment, exposure, follow-up, and data collection<br><b>Pag. 5,6</b>                                                                                                                                                                                        |
| Participants                 | 6       | Give the eligibility criteria, and the sources and methods of selection of participants. Describe methods of follow-up<br><b>Pag. 5,6</b>                                                                                                                                                                                                 |
|                              |         | For matched studies, give matching criteria and number of exposed and unexposed<br><b>Pag. 6</b>                                                                                                                                                                                                                                          |
| Variables                    | 7       | Clearly define all outcomes, exposures, predictors, potential confounders, and effect modifiers. Give diagnostic criteria, if applicable<br><b>Pag. 6 to 8</b>                                                                                                                                                                            |
| Data sources/<br>measurement | 8*      | For each variable of interest, give sources of data and details of methods of assessment (measurement). Describe comparability of assessment methods if there is more than one group<br><b>Pag. 5 to 8</b>                                                                                                                                |
| Bias                         | 9       | Describe any efforts to address potential sources of bias<br><b>Pag. 6 to 8</b>                                                                                                                                                                                                                                                           |
| Study size                   | 10      | Explain how the study size was arrived at<br><b>No formal calculation, descriptive study. Criteria for the cohort selection and follow-up are described in pag. 5,6</b>                                                                                                                                                                   |
| Quantitative variables       | 11      | Explain how quantitative variables were handled in the analyses. If applicable, describe which groupings were chosen and why<br><b>Pag. 7,8</b>                                                                                                                                                                                           |
| Statistical methods          | 12      | (a) Describe all statistical methods, including those used to control for confounding<br>(b) Describe any methods used to examine subgroups and interactions<br>(c) Explain how missing data were addressed<br>(d) If applicable, explain how loss to follow-up was addressed<br>(e) Describe any sensitivity analyses<br><b>Pag. 7,8</b> |
| <b>Results</b>               |         |                                                                                                                                                                                                                                                                                                                                           |
| Participants                 | 13*     | Report numbers of individuals at each stage of study—eg numbers potentially eligible, examined for eligibility, confirmed eligible, included in the study,                                                                                                                                                                                |

|                          |     |                                                                                                                                                                                                          |
|--------------------------|-----|----------------------------------------------------------------------------------------------------------------------------------------------------------------------------------------------------------|
|                          |     | completing follow-up, and analysed                                                                                                                                                                       |
|                          |     | <b>Pag. 6</b>                                                                                                                                                                                            |
|                          |     | Give reasons for non-participation at each stage                                                                                                                                                         |
|                          |     | <b>Not applicable</b>                                                                                                                                                                                    |
|                          |     | (c) Consider use of a flow diagram                                                                                                                                                                       |
| Descriptive data         | 14* | Give characteristics of study participants (eg demographic, clinical, social) and information on exposures and potential confounders                                                                     |
|                          |     | <b>Pag. 6</b>                                                                                                                                                                                            |
|                          |     | Indicate number of participants with missing data for each variable of interest                                                                                                                          |
|                          |     | <b>Not applicable</b>                                                                                                                                                                                    |
|                          |     | Summarise follow-up time (eg, average and total amount)                                                                                                                                                  |
|                          |     | <b>Pag. 8</b>                                                                                                                                                                                            |
| Outcome data             | 15* | Report numbers of outcome events or summary measures over time                                                                                                                                           |
|                          |     | <b>Pag. 8 to 18</b>                                                                                                                                                                                      |
| Main results             | 16  | Give unadjusted estimates and, if applicable, confounder-adjusted estimates and their precision (eg, 95% confidence interval). Make clear which confounders were adjusted for and why they were included |
|                          |     | <b>Pag. 8 to 18</b>                                                                                                                                                                                      |
|                          |     | Report category boundaries when continuous variables were categorized                                                                                                                                    |
|                          |     | <b>Not applicable</b>                                                                                                                                                                                    |
|                          |     | If relevant, consider translating estimates of relative risk into absolute risk for a meaningful time period                                                                                             |
|                          |     | <b>Pag. 19</b>                                                                                                                                                                                           |
| Other analyses           | 17  | Report other analyses done—eg analyses of subgroups and interactions, and sensitivity analyses                                                                                                           |
|                          |     | <b>Pag. 11 to 18</b>                                                                                                                                                                                     |
| <b>Discussion</b>        |     |                                                                                                                                                                                                          |
| Key results              | 18  | Summarise key results with reference to study objectives                                                                                                                                                 |
|                          |     | <b>Pag. 19,20</b>                                                                                                                                                                                        |
| Limitations              | 19  | Discuss limitations of the study, taking into account sources of potential bias or imprecision. Discuss both direction and magnitude of any potential bias                                               |
|                          |     | <b>Pag. 19</b>                                                                                                                                                                                           |
| Interpretation           | 20  | Give a cautious overall interpretation of results considering objectives, limitations, multiplicity of analyses, results from similar studies, and other relevant evidence                               |
|                          |     | <b>Pag. 19 to 21</b>                                                                                                                                                                                     |
| Generalisability         | 21  | Discuss the generalisability (external validity) of the study results                                                                                                                                    |
|                          |     | <b>Pag. 22</b>                                                                                                                                                                                           |
| <b>Other information</b> |     |                                                                                                                                                                                                          |
| Funding                  | 22  | Give the source of funding and the role of the funders for the present study and, if applicable, for the original study on which the present article is based                                            |
|                          |     | <b>Pag. 25</b>                                                                                                                                                                                           |

\*Give information separately for exposed and unexposed groups.

**Note:** An Explanation and Elaboration article discusses each checklist item and gives methodological background and published examples of transparent reporting. The STROBE checklist is best used in conjunction with this article (freely available on the Web sites of PLoS Medicine at <http://www.plosmedicine.org/>, Annals of Internal Medicine at <http://www.annals.org/>, and Epidemiology at <http://www.epidem.com/>). Information on the STROBE Initiative is available at <http://www.strobe-statement.org>.
